# Supplementary material
Source: PubMed Central journal article supplement (PMC8329270)
Supplement: plantbiotechnology-38-2-21.0407a-s001.pdf [file plantbiotechnology-38-2-21.0407a-s001.pdf]

1 **Efficient genome editing and gene knockout in *Setaria viridis* with CRISPR/Cas9 directed gene**  
2 **editing by the non-homologous end-joining pathway**

3

4 Marcos Fernando Basso<sup>1,2</sup>, Karoline Estefani Duarte<sup>1,3</sup>, Thais Ribeiro Santiago<sup>4</sup>, Wagner Rodrigo de  
5 Souza<sup>3</sup>, Bruno de Oliveira Garcia<sup>1</sup>, Bárbara Dias Brito da Cunha<sup>1</sup>, Adilson Kenji Kobayashi<sup>1</sup>, Hugo  
6 Bruno Correa Molinari<sup>1\*</sup>

7

8 <sup>1</sup> National Center for Agroenergy Research (CNPAAE), Brazilian Agricultural Research Corporation  
9 (EMBRAPA), Brasília, DF, 70770-901, Brazil

10 <sup>2</sup>BIOMOL/BIOTEC Laboratory, Mato Grosso Cotton Institute (IMAmt), Rondonópolis, MT, 78740-  
11 970, Brazil

12 <sup>3</sup> Center for Natural and Human Sciences, Federal University of ABC (UFABC), São Bernardo do  
13 Campo, São Paulo, 09606-045, Brazil

14 <sup>4</sup> Department of Phytopathology, Federal University of Brasília, Brasília (UNB), Distrito Federal,  
15 70910-900, Brazil

16 **Corresponding author:**

17 Dr. Hugo Bruno Correa Molinari

18 Embrapa Agroenergia CNPAE, Parque Estação Biológica - PqEB s/nº, Brasília, DF, Brazil, 70770-

19 901

20 Phone: +55 (61) 3448 2307

21 E-mail: [hugo.molinari@embrapa.br](mailto:hugo.molinari@embrapa.br)

22

## SUPPLEMENTARY MATERIAL

**Supplementary Table S1.** Top 20 off-target sites of the gRNA used in this study predicted in *Setaria viridis* genome using the CCTop software.

| Coordinates                | Strand <sup>1</sup> | Mismatches | Target sequence <sup>2</sup> | PAM | Distance <sup>3</sup> |   | Gene name/ID     |
|----------------------------|---------------------|------------|------------------------------|-----|-----------------------|---|------------------|
| Chr_09:14268254-14268276 * | +                   | 4          | GACAAGGA[TGGGGATGTGAA]       | GGG | 492                   | - | Sevir.9G201200.1 |
| Chr_02:34471610-34471632   | -                   | 3          | GTAGTGGA[TGGTGAGGTGAA]       | GGG | 1915                  | - | Sevir.2G263600.1 |
| Chr_04:11547181-11547203 # | +                   | 4          | GATCTGGC[TCCTGATGTGAA]       | AGG | 10812                 | - | Sevir.4G118700.1 |
| Chr_03:710993-711015       | -                   | 4          | CAGCTGGA[TTGTGGTGTGAA]       | TGG | 0                     | E | Sevir.3G011900.1 |
| Chr_06:2592841-2592863     | +                   | 4          | GAATTGAA[AGGTGGTGTGAA]       | GGG | 16                    | - | Sevir.6G032200.1 |
| Chr_01:35855582-35855604   | +                   | 4          | GACCTGGC[TGTTTCATGTGAA]      | AGG | 0                     | E | Sevir.1G306300.1 |
| Chr_04:22260779-22260801   | -                   | 4          | GTTCTGGA[TGGAGAGGTGAA]       | TGG | 2630                  | - | Sevir.4G161600.1 |
| Chr_03:17717572-17717594   | +                   | 4          | GAACTAAA[TGCTGACGTGAA]       | AGG | 328                   | - | Sevir.3G229500.1 |
| Chr_04:37352407-37352429   | +                   | 4          | GAACGCGA[TGGAGAGGTGAA]       | CGG | 0                     | E | Sevir.4G273400.1 |
| Chr_09:29625651-29625673   | -                   | 4          | GATCTAGA[TGGGGATGAGAA]       | GGG | 41334                 | - | Sevir.9G287800.1 |
| Chr_05:37149828-37149850   | +                   | 4          | AAAATGGA[TGGTCATGCGAA]       | AGG | 0                     | E | Sevir.5G340200.1 |
| Chr_03:31687859-31687881   | +                   | 4          | GAGCTTGA[CGGTGATGTCAA]       | TGG | 47468                 | - | Sevir.3G311300.1 |
| Chr_03:2349442-2349464     | +                   | 4          | GAAATTGT[TGGTGATGTGCA]       | TGG | 0                     | E | Sevir.3G037400.1 |
| Chr_05:37023083-37023105   | -                   | 4          | GACCCGGA[GGGTGATGTGGA]       | AGG | 3399                  | - | Sevir.5G338300.1 |
| Chr_09:9774624-9774646     | -                   | 4          | GCGCTGGA[TGGGGATGTGGA]       | GGG | 1911                  | - | Sevir.9G151700.2 |
| Chr_06:7819868-7819890     | +                   | 4          | GGTCTGGA[TGGTCATGTGGA]       | GGG | 0                     | E | Sevir.6G085300.1 |
| Chr_01:34163227-34163249   | -                   | 4          | GGTCTGGA[TGGTCATGTGGA]       | GGG | 0                     | E | Sevir.1G283100.1 |
| Chr_05:4493822-4493844     | +                   | 4          | GTACGGGG[TGGTGATGTGAC]       | TGG | 0                     | E | Sevir.5G057500.1 |
| Chr_05:14897355-14897377   | -                   | 4          | GAGGTGGA[TGGTGGTGTGGA]       | GGG | 5970                  | - | Sevir.5G161500.1 |
| Chr_01:33115978-33116000   | -                   | 4          | GAACTAGG[TGATGATGTGAT]       | CGG | 384                   | - | Sevir.1G269600.1 |

<sup>1</sup> Orientation of the off-target site.

<sup>2</sup> Off-target sequence are show with highlighted mismatches in red, while core sequence in square brackets.

<sup>3</sup> Distance to the closest exon (0 if target site and exon coordinates overlap); Legend for off-target site position: E = exonic; I = intronic; - = intergenic.

# named in this work of off-target 1

\* named in this work of off-target 2

**Supplementary Table S2.** Primer sets used in this study.

| Gene                           | ID or position           | Goal | Primer name      | Sequence 5' - 3'       | Reference              |
|--------------------------------|--------------------------|------|------------------|------------------------|------------------------|
| <i>bar</i>                     | Binary vector            | PCR  | BAR(F)           | ACCATCGTGACCACTACATC   | This work              |
|                                |                          |      | BAR(R)           | GTGCCTGCACATCAACAAAT   |                        |
| <i>ZmUBI:GFP</i>               | Binary vector            | PCR  | <i>ZmUBI</i> (F) | TGTGTTAGATCCGTGCTGCT   | This work              |
|                                |                          |      | GFP(R)           | CATGTGGTCCCTCTTCTCGT   |                        |
| Translation factor <i>SUII</i> | Sevir.2G348300           | qPCR | <i>SvSUI</i> (F) | CCAGAGCTTGGACAGGTCATTC | (Martins et al., 2016) |
|                                |                          |      | <i>SvSUI</i> (R) | ACAATGCCAGCCTGGACAA    |                        |
| <i>gfp</i> transgene           | -                        | qPCR | GFPq(F)          | CTACGGTGTTCAAGTGCTTCTC | This work              |
|                                |                          |      | GFPq(R)          | GTGTCTTGTAGTTCCCGTCATC |                        |
| Off-target1                    | Chr_09:14268254-14268276 | PCR  | Off-target1(F)   | CTCATCACGACCATAAGCAGC  | This work              |
|                                |                          |      | Off-target1(R)   | GAGAATCAGCCACGGGTCAA   |                        |
| Off-target2                    | Chr_04:11547181-11547203 | PCR  | Off-target2(F)   | ATCTGAAGTGGCACAGCCAA   | This work              |
|                                |                          |      | Off-target2(R)   | TGTGCAGAGCATTGGGTCAT   |                        |

**Supplementary Table S3:** Decoding of mono and biallelic *indels* introduced by CRISPR/Cas9 NHEJ system in *gfp* transgene. For decoding were performed the direct Sanger sequencing of PCR products from the target gene of *Setaria viridis* co-transforming EC1 to EC10 events compared with ECWT1 and ECWT2 plant (GFP-positive controls, wild-type *gfp* gene, and negative control for genome editing).

| Events                                                            | Chromatogram analysis and degenerate nucleotide sequence                                                     | Results of genome edition                                                                                                                                                                                                                                                                      |
|-------------------------------------------------------------------|--------------------------------------------------------------------------------------------------------------|------------------------------------------------------------------------------------------------------------------------------------------------------------------------------------------------------------------------------------------------------------------------------------------------|
| ECWT1                                                             | GGATGGTGATGTGAACGGGCAC                                                                                       | Non-edited control lineage 1                                                                                                                                                                                                                                                                   |
| ECWT2                                                             | GGATGGTGATGTGAACGGGCAC                                                                                       | Non-edited control lineage 2                                                                                                                                                                                                                                                                   |
| EC1                                                               | GGAACTGGATGGTGAT <sup>T/G T/G G/A A C/A C/G</sup> GGC <sup>A/C C A/C</sup> (possibilities from chromatogram) | Allele 1: deletion of G nucleotide at position 5 upstream to the PAM sequence.<br>Allele 2: no indels. Therefore, the EC1 event has the <i>gfp</i> transgene knocked out in a single allele (heterozygous or monoallelic mutant).                                                              |
|                                                                   | GGAACTGGATGGTGAT K K R A M S GGC M C M (degenerate nucleotides)                                              |                                                                                                                                                                                                                                                                                                |
|                                                                   | GGAACTGGATGGTGAT <b>G G A A A G GGC A C A</b> (possibilities 1)                                              |                                                                                                                                                                                                                                                                                                |
|                                                                   | GGAACTGGATGGTGAT <b>T T G A C C GGC C C C</b> (possibilities 2)                                              |                                                                                                                                                                                                                                                                                                |
|                                                                   | Alignments:                                                                                                  |                                                                                                                                                                                                                                                                                                |
|                                                                   | ECWT lineage GGAAC <b>T</b> GGATGGTGATGTGAACGGGCAC-                                                          |                                                                                                                                                                                                                                                                                                |
|                                                                   | EC1 lineage GGAAC <b>T</b> GGATGGTGAT-KKRAMSGGC <b>M</b> C <b>M</b>                                          |                                                                                                                                                                                                                                                                                                |
|                                                                   | Allele 1 GGAAC <b>T</b> GGATGGTGAT <b>TGAACGGGCACA</b><br>*****-*****                                        |                                                                                                                                                                                                                                                                                                |
|                                                                   | ECWT lineage GGAAC <b>T</b> GGATGGTGATGTGAACGGGCAC                                                           |                                                                                                                                                                                                                                                                                                |
|                                                                   | Allele 2 GGAAC <b>T</b> GGATGGTGAT <b>GTGAACGGGCAC</b><br>*****                                              |                                                                                                                                                                                                                                                                                                |
| [ ] Information retrieved of chromatogram from reverse sequencing |                                                                                                              |                                                                                                                                                                                                                                                                                                |
| EC2                                                               | GGAACTGGATGGTGATG <sup>A/T A/T C/G C/A G/A C/G C/G A/G C/G C/A A</sup>                                       | Allele 1: insertion of A nucleotide at position 5 upstream to the PAM sequence.<br>Allele 2: deletion of GA nucleotides at positions 2 and 3 upstream to the PAM sequence. Therefore, the EC2 event has the <i>gfp</i> transgene knocked out in both alleles (biallelic mutant).               |
|                                                                   | GGAACTGGATGGTGATG W W S M R S S R S M A                                                                      |                                                                                                                                                                                                                                                                                                |
|                                                                   | GGAACTGGATGGTGATG <b>A A G A A G G A G A A</b>                                                               |                                                                                                                                                                                                                                                                                                |
|                                                                   | GGAACTGGATGGTGATG <b>T T C A G C C G C C A</b>                                                               |                                                                                                                                                                                                                                                                                                |
|                                                                   | Alignments:                                                                                                  |                                                                                                                                                                                                                                                                                                |
|                                                                   | ECWT lineage GGAAC <b>T</b> GGATGGTGATG-TGAACGGGCAC                                                          |                                                                                                                                                                                                                                                                                                |
|                                                                   | EC2 lineage GGAAC <b>T</b> GGATGGTGATGWWSMRSSRSMA-                                                           |                                                                                                                                                                                                                                                                                                |
|                                                                   | Allele 1 GGAAC <b>T</b> GGATGGTGATG <b>ATGAACGGGCA</b> -<br>*****-*****                                      |                                                                                                                                                                                                                                                                                                |
|                                                                   | ECWT lineage GGAAC <b>T</b> GGATGGTGATGTGAACGGGCACAA                                                         |                                                                                                                                                                                                                                                                                                |
|                                                                   | Allele 2 GGAAC <b>T</b> GGATGGTGATG <b>T--ACGGGCACAA</b><br>*****-*****                                      |                                                                                                                                                                                                                                                                                                |
| [ ] Information retrieved of chromatogram from reverse sequencing |                                                                                                              |                                                                                                                                                                                                                                                                                                |
| EC3                                                               | <b>Chromatogram from forward sequencing:</b>                                                                 | Allele 1: deletion of ATGT nucleotides at positions 4 to 7 upstream to the PAM sequence.<br>Allele 2: two deletions of G nucleotide at positions 14 and 11 upstream to the PAM sequence. Therefore, the EC3 event has the <i>gfp</i> transgene knocked out in both alleles (biallelic mutant). |
|                                                                   | GGAACTG <sup>T/G A/T C/T G/A C/G A/T G/A G A/T A/T C T/G C/G C/G C/G A/T CA G/A G/C T/G</sup>                |                                                                                                                                                                                                                                                                                                |
|                                                                   | GGAACTG K W Y R S W R G W W C K S S S W C A R S K                                                            |                                                                                                                                                                                                                                                                                                |
|                                                                   | GGAACTG <b>G A C A G A A G A A C G G G G A C A A G G</b>                                                     |                                                                                                                                                                                                                                                                                                |
|                                                                   | GGAACTG <b>T T T G C T G G T T C T C C C T C A G C T</b>                                                     |                                                                                                                                                                                                                                                                                                |
|                                                                   | Alignments:                                                                                                  |                                                                                                                                                                                                                                                                                                |

ECWT lineage GGAACTGGATGGTGTGTGAACGGGCACAAGT  
 EC3 lineage GGAACTGKWYRSWR----GWWCKSSSWCARSK  
 Allele 1 GGAACTG**GATGGTG**----**GAACGGGCACAAGT**  
 \*\*\*\*\*-----\*\*\*\*\*????

or

Allele 1: deletions of A and T nucleotides at positions 4 to 7 and insertions of C/A, T and G nucleotides at positions 9, 14 and 16 downstream to the PAM sequence.

ECWT lineage GGAACTGGATGGTGTGTGAACGGGCACAA  
 Allele 2 GGAACTG-**TT**-**CACAAGTTCTCCGT****CACAA**  
 \*\*\*\*\*--\*-----\*--\*-----\*-----\*

Allele 2: insertions of AA, A, G and G nucleotides at positions 2 and 3 upstream, deletions of C nucleotides at positions 11 to 12 and 16 downstream to the PAM sequence. Therefore, the EC3 event has the *gfp* transgene knocked out in both alleles (biallelic mutant).

[ ] Information retrieved of chromatogram from reverse sequencing

**Chromatogram from reverse sequencing**

GACGGGAACTTGTG <sup>A/C</sup> <sup>A/C</sup> <sup>C</sup> <sup>G/A</sup> <sup>T/G</sup> <sup>T</sup> <sup>T/C</sup> <sup>C</sup> <sup>A</sup> <sup>C</sup> <sup>C/A</sup> <sup>T/A</sup> <sup>C</sup> <sup>C/G</sup> <sup>A</sup> <sup>T/G</sup> <sup>T</sup> <sup>T/G</sup> <sup>C/G</sup> <sup>C/G</sup>  
 GACGGGAACTTGTG M M C R K T Y C A C M W C S A K T K S S  
 GACGGGAACTTGTG **A** **A** **C** **G** **T** **T** **C** **A** **C** **C** **T** **C** **C** **A** **A** **T** **G** **C** **C**  
 GACGGGAACTTGTG **C** **C** **C** **A** **G** **T** **C** **C** **A** **C** **A** **A** **C** **G** **A** **T** **T** **G** **G**

Alignments:

ECWT lineage GACGGGAACTTGTG**CCCGTTCACATC**-ACCA-T-CC  
 EC3 lineage GACGGGAACTTGTG**M M C R K T Y**-CA-CMWCSAKTKSS  
 Allele 1 GACGGGAACTTGTG**CCCGTTC**-**CA**-**CCACCATTGCC**  
 \*\*\*\*\*-----\*--\*-----\*-----\*

ECWT lineage GACGGGAACTTGTG--**CCC**-GTT**CACATC**-ACC-ATCCAGTTCC  
 Allele 2 GACGGGAACTTGTG**AA**--**CAGTTCACATCGA**--**GTT**-**CAGTTCC**  
 \*\*\*\*\*-----\*-----\*-----\*-----\*

[ ] Information retrieved of chromatogram from forward sequencing

EC4

GGAACTGGATGGTGTAT <sup>T/G</sup> <sup>T/G</sup> <sup>A</sup> <sup>G/A</sup> <sup>C/A</sup> <sup>G/A</sup> <sup>G/C</sup> <sup>G</sup> <sup>G/C</sup> <sup>G/A</sup> <sup>CA</sup> <sup>A/C</sup> <sup>G/A</sup>  
 GGAACTGGATGGTGTAT K K A R M R S G S R C A M R  
 GGAACTGGATGGTGTAT **T** **T** **A** **G** **C** **G** **G** **G** **G** **C** **A** **A** **G**  
 GGAACTGGATGGTGTAT **G** **G** **A** **A** **A** **A** **C** **G** **C** **A** **C** **A** **A**

Allele 1: deletion of G nucleotide at position 5 upstream to the PAM sequence.

Alignments:

ECWT lineage GGAACTGGATGGTGTATGTGAACGGGCACAAG  
 EC4 lineage GGAACTGGATGGTGTAT-KKARMRSGSRCAMR  
 Allele 1 GGAACTGGATGGTGTAT-**TGAACGGGCACAAG**  
 \*\*\*\*\*-----\*\*\*\*\*

Allele 2: insertion of A nucleotide at position 4 upstream to the PAM sequence. Therefore, the EC4 event has the *gfp* transgene knocked out in both alleles (biallelic mutant).

ECWT lineage GGAACTGGATGGTGTATGT-GAACGGGCACA  
 Allele 2 GGAACTGGATGGTGTAT**GTA****GAACGGGCACA**  
 \*\*\*\*\*-----\*-----\*\*\*\*\*

[ ] Information retrieved of chromatogram from forward sequencing

EC5

GGAACTGGATGGTGTAT <sup>T/G</sup> <sup>G/A</sup> <sup>A</sup> <sup>C/A</sup> <sup>C</sup> <sup>G/A</sup> <sup>C/G</sup> <sup>C/G</sup> <sup>A/C</sup> <sup>A/C</sup> <sup>CA</sup> <sup>A/C</sup> <sup>T/G</sup>  
 GGAACTGGATGGTGTAT K R A M C R S S M M C A M K

Allele 1: deletion of G nucleotide at position 5 upstream to the PAM sequence.

GGAACTGGATGGTGAT T G A C C G C C A A C A A T  
 GGAACTGGATGGTGAT G A A A C A G G C C C A C G

Alignments:

ECWT lineage GGAACTGGATGGTGATGTGAACGGGCACAAG  
 EC5 lineage GGAACTGGATGGTGAT--KRAMCRSSMCMK  
 Allele 1 GGAACTGGATGGTGAT--TGAACGGGAACAAG  
 \*\*\*\*\*\_\*\*\*\*\*

ECWT lineage GGAACTGGATGGTGATGTGAACGGGCACA  
 Allele 2 GGAACTGGATGGTGAT--GAACGGGCACA  
 \*\*\*\*\*\_\*\*\*\*\*

Allele 2: deletions of GT nucleotides at positions the 4 to 5 upstream to the PAM sequence. Therefore, the EC5 event has the *gfp* transgene knocked out in both alleles (biallelic mutant).

[ ] Information retrieved of chromatogram from reverse sequencing

GGAACTGGATGGTGATG <sup>A/T</sup> <sup>A/T</sup> <sup>C/G</sup> <sup>A/G</sup> <sup>A/G</sup> <sup>C/G</sup> <sup>C/G</sup> <sup>G/A</sup> <sup>C/G</sup> <sup>C/A</sup> A  
 GGAACTGGATGGTGATG W W S R R S S R S M A  
 GGAACTGGATGGTGATG A A C A A C C G C C A  
 GGAACTGGATGGTGATG T T G G G G G A G A A

Alignments:

**EC6**  
 ECWT lineage GGAACTGGATGGTGATGTGAACGGGCACAA  
 EC6 lineage GGAACTGGATGGTGATG--WWSRRSSRSM  
 Allele 1 GGAACTGGATGGTGATG--AACGGGCACAA  
 \*\*\*\*\*\_\*\*\*\*\*

Allele 1: deletion of TG nucleotides at position 3 to 4 upstream to the PAM sequence.  
 Allele 2: insertion of T nucleotide at position 5 upstream to the PAM sequence. Therefore, the EC6 event has the *gfp* transgene knocked out in both alleles (biallelic mutant).

ECWT lineage GGAACTGGATGGTGATG--TGAACGGGCA  
 Allele 2 GGAACTGGATGGTGATGTTGAACGGGCA  
 \*\*\*\*\*\_\*\*\*\*\*

GGAACTGGATGGTGATG <sup>A/T</sup> <sup>A/G</sup> A <sup>A/C</sup> <sup>G/C</sup> GG <sup>C/G</sup> <sup>A/C</sup> <sup>A/C</sup> <sup>A/C</sup>  
 GGAACTGGATGGTGATG W R A M S GG S M M M  
 GGAACTGGATGGTGATG A A A A G GG C A A A  
 GGAACTGGATGGTGATG T G A C C GG G C C C

Alignments:

**EC7**  
 ECWT lineage GGAACTGGATGGTGATGTGAACGGGCAC  
 EC7 lineage GGAACTGGATGGTGATGWRAMSGGSM  
 Allele 1 GGAACTGGATGGTGATGTGAACGGGCAC  
 \*\*\*\*\*

Allele 1: no indels.  
 Allele 2: deletion of TG nucleotides at positions 3 to 4 upstream to the PAM sequence. Therefore, the EC7 event has the *gfp* transgene knocked out in a single allele (heterozygous or monoallelic mutant).

ECWT lineage GGAACTGGATGGTGATGTGAACGGGCACA  
 Allele 2 GGAACTGGATGGTGATG--AACGGGCACA  
 \*\*\*\*\*\_\*\*\*\*\*

[ ] Information retrieved of chromatogram from reverse sequencing

GGAACTGGATGGTGATG <sup>T/G</sup> <sup>A/G</sup> A <sup>A/C</sup> <sup>C/G</sup> GG <sup>C/G</sup> <sup>A/C</sup> <sup>A/C</sup> <sup>A/C</sup>  
 GGAACTGGATGGTGATG K R A M S GG S M M M

**EC8**

Allele 1: deletion of T nucleotide at position 4 upstream to the PAM sequence.

GGAACTGGATGGTGATG T A A A C GG C A A A  
 GGAACTGGATGGTGATG G G A C G GG G C C C

Alignments:

ECWT lineage GGAACTGGATGGTGATGTGAACGGGCACA  
 EC8 lineage GGAACTGGATGGTGATGKRAMSGGSM  
 Allele 1 GGAACTGGATGGTGATG-GAACGGGCACA  
 \*\*\*\*\*\_\*\*\*\*\*

ECWT lineage GGAACTGGATGGTGATGTGAACGGGCAC  
 Allele 2 GGAACTGGATGGTGATGTGAACGGGCAC  
 \*\*\*\*\*

Allele 2: no indels. Therefore, the EC8 event has the *gfp* transgene knocked out in a single allele (heterozygous or monoallelic mutant).

EC9

GGAACTGGATGGTGATG <sup>A/T</sup> <sup>G/A</sup> <sup>C/A</sup> <sup>A/G</sup> <sup>C/G</sup> <sup>G/C</sup> <sup>G/A</sup> <sup>C/A</sup> <sup>C/A</sup>  
 GGAACTGGATGGTGATG W R M R S G S R C M M  
 GGAACTGGATGGTGATG A G C A C G G G C A C  
 GGAACTGGATGGTGATG T A A G G G C A C C A

Alignments:

ECWT lineage GGAACTGGATGGTGATGTGAACGGGCACAC  
 EC9 lineage GGAACTGGATGGTGATGWRMRSGSRMM  
 Allele 1 GGAACTGGATGGTGATGTGAACGGGCACAC  
 \*\*\*\*\*

ECWT lineage GGAACTGGATGGTGATGTGAACGGGCACAC  
 Allele 2 GGAACTGGATGGTGATG--AACGGGCACAC  
 \*\*\*\*\*\_\*\*\*\*\*

Allele 1: no indels.  
 Allele 2: deletion of TG nucleotides at positions 3 to 4 upstream to the PAM sequence. Therefore, the EC7 event has the *gfp* transgene knocked out in a single allele (heterozygous or monoallelic mutant).

[ ] Information retrieved of chromatogram from reverse sequencing

EC10

GGAACTGGATGGTGATG <sup>G/A</sup> <sup>A</sup> <sup>A/C</sup> <sup>C/G</sup> <sup>GG</sup> <sup>G/C</sup> <sup>AC</sup> <sup>A/C</sup> <sup>A</sup>  
 GGAACTGGATGGTGATG R A M S GG S AC M A  
 GGAACTGGATGGTGATG G A A C GG G AC A A  
 GGAACTGGATGGTGATG A A C G GG C AC C A

Alignments:

ECWT lineage GGAACTGGATGGTGATGTGAACGGGCACAC  
 EC10 lineage GGAACTGGATGGTGATGRAMSGGSACMA  
 Allele 1 GGAACTGGATGGTGATG--AACGGGCACAC  
 \*\*\*\*\*\_\*\*\*\*\*

ECWT lineage GGAACTGGATGGTGATGTGAACGGGCACAC  
 Allele 2 GGAACTGGATGGTGATG-GAACGGGACCAC  
 \*\*\*\*\*\_\*\*\*\*\*

Allele 1: deletions of TG nucleotides at positions 3 to 4 upstream to the PAM sequence.  
 Allele 2: deletion of T nucleotide at position 3 upstream to the PAM sequence. Therefore, the EC10 event has the *gfp* transgene knocked out in both alleles (biallelic mutant).

[ ] Information retrieved of chromatogram from reverse sequencing



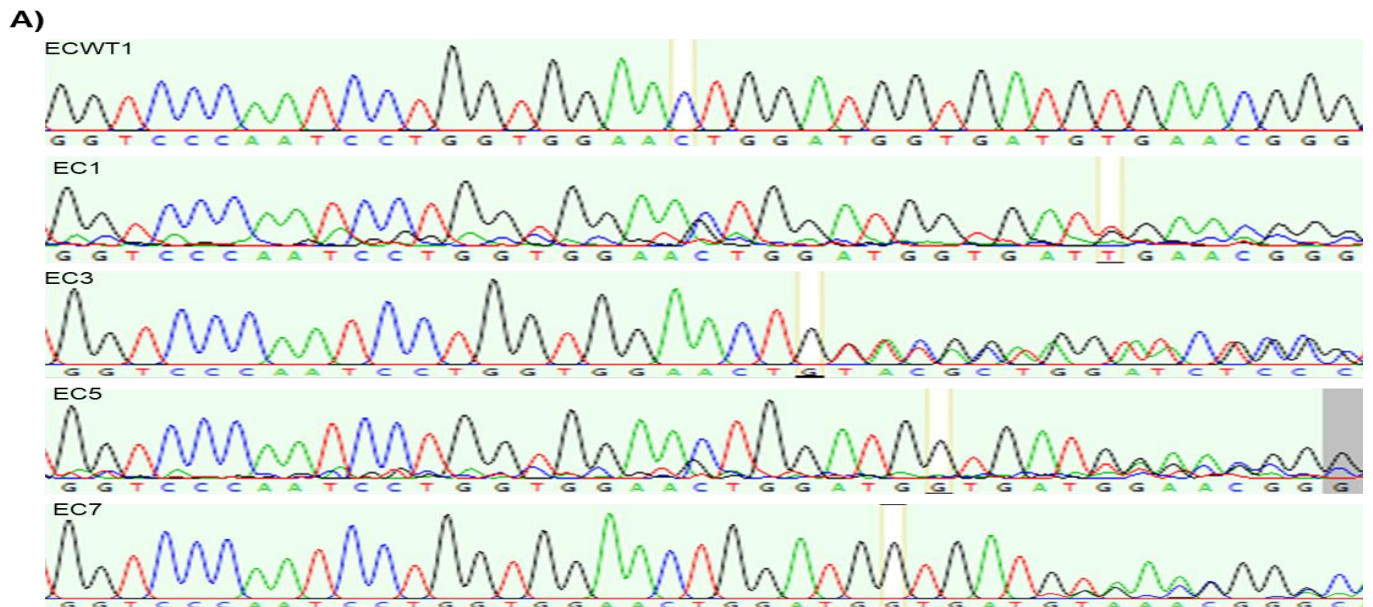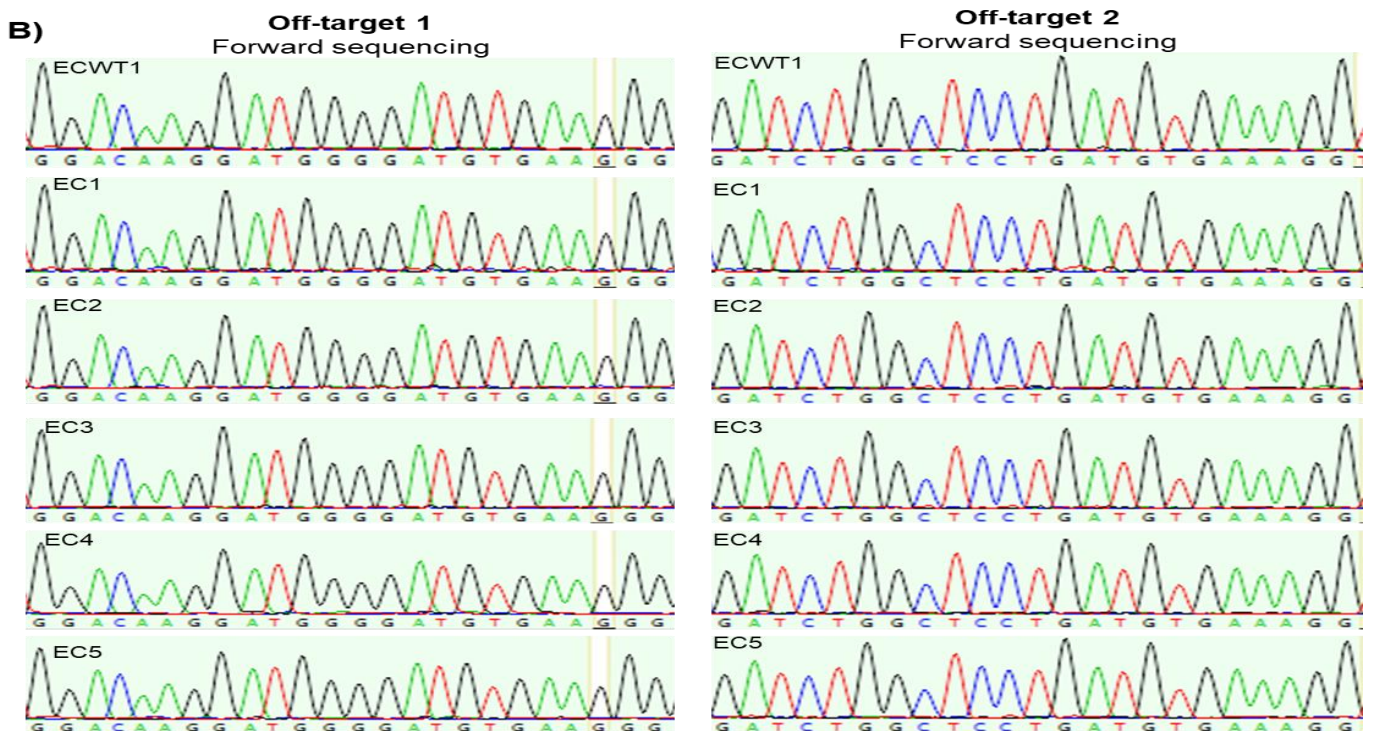

**Supplementary Figure S1.** Inheritance *indels* induced by CRISPR/Cas9 NHEJ system and absence of off-targets. **(A)** Inheritance and stability of mutations induced by CRISPR/Cas9 from T<sub>0</sub> to T<sub>1</sub> generation. Sanger sequencing of PCR products from the ZmUBI:GFP target sequence of the CRISPR/Cas9 NHEJ system. Sequencing forward and reverse were carried out using ZmUBI(F) and GFP(R) primers (Supplemental Table S2). The co-transforming EC1, EC3, EC5, and EC7 events compared to ECWT1 plants (wild-type *gfp* gene, negative control for edition) from T<sub>1</sub> generation. **(B)** Absence of putative off-targets in regions outside the target induced by the CRISPR/Cas9 NHEJ system. Sanger sequencing of PCR products from top three predicted off-target sites (Supplemental Table S1) in the co-transforming EC1 to EC5 events compared with ECWT1 plants (wild-type *gfp* gene, negative control for edition) from T<sub>0</sub> generation. PCR and sequencing were performed using primers flanking the off-target sites (Supplemental Table S2).

## Supplementary File S1. Nucleotide and deduced amino acid sequences of the *gfp* gene used in this study.

### GFP\_CDS without intron

#### ECWT1 and ECWT2

Allele 1: wild-type gene

Allele 2: wild-type gene

Atgggcaagggcgaggaactgttcactggcgtggtcccaatcctggtggaactggatggtgatgtgaaaggcacaagttctccgtcagcggaga  
gggtgaaggtgatgccacctacggaaagctcaccctgaagttcatctgcactaccggaaagctccctgttccgtggccaaccctcgtcaccactt  
tcacctacgggtgttcagtgcttctcccggtaccagatcacatgaagcagcatgacttcttcaagagcgccatgccgaaggctacgtgcaagaa  
aggactatcttcttcaaggtgacgggaactacaagacacgtgccgaagtcaagttcgaaggtgataccctggtgaaccgcatcgagctgaaagg  
tatcgatttcaaggaagatggaacatcctcggacacaagctggagtagaactacaactcccacaacgtatacatcatggccgacaagcagaaga  
acggcatcaaggtgaacttcaagatcaggcacaacatcgaagatggaagcgtgcaactggcggaccactaccagcagaacacgcccacatcggcgat  
ggcctgtcctgctgcccggacaaccattacctgtccacgcaatctgcctctccaaggacccaacgagaagaggaccacatggtcctgctgga  
gttcgtgacggctgctgggatcacgcatggcatggatgaactctacaagtga

atgggcaagggcgaggaactgttcactggcgtggtcccaatcctggtggaactggatggt

M G K G E E L F T G V V P I L V E L D G  
gatgtgaaaggcacaagttctccgtcagcggaggggtgaaggtgatgccacctacgga  
D V N G H K F S V S G E G D A T Y G  
aagctcaccctgaagttcatctgcactaccggaaagctccctgttccgtggccaaccctc  
K L T L K F I E T T G K L P V P W P T L  
gtcaccactttcacctacgggtgttcagtgcttctcccggtaccagatcacatgaagcag  
V T T F T Y G V Q C F S R Y P D H M K Q  
catgacttcttcaagagcgccatgcccgaaggctacgtgcaagaaaggactatcttcttc  
H D F F K S A M P E G Y V Q E R T I F F  
aaggatgacgggaactacaagacacgtgccgaagtcaagttcgaaggtgataccctggtg  
K D D G N Y K T R A E V K F E G D T L V  
aaccgcatcgagctgaaaggtatcgatttcaaggaagatggaacatcctcggacacaag  
N R I E L K G I D F K E D G N I L G H K  
ctggagtacaactacaactcccacaacgtatacatcatggccgacaagcagaagaacggc  
L E Y N Y N S H N V Y I M A D K Q K N G  
atcaaggtgaacttcaagatcaggcacaacatcgaagatggaagcgtgcaactggcggac  
I K V N F K I R H N I E D G S V Q L A D  
cactaccagcagaacacgcccacatcgccgatggccctgtcctgctgcccggacaaccattac  
H Y Q Q N T P I G D G P V L L P D N H Y  
ctgtccacgcaatctgcctctccaaggacccaacgagaagaggaccacatggtcctg  
L S T Q S A L S K D P N E K R D H M V L  
ctggagttcgtgacggctgctgggatcacgcatggcatggatgaactctacaagtga  
L E F V T A A G I T H G M D E L Y K -

### EC1 co-transforming event: monoallelic

Allele 1: deletion of G

AtgggcaagggcgaggaactgttcactggcgtggtcccaatcctggtggaactggatggtgatGtgaaaggcacaagttctccgtcagcggaga  
gggtgaaggtgatgccacctacggaaagctcaccctgaagttcatctgcactaccggaaagctccctgttccgtggccaaccctcgtcaccactt  
tcacctacgggtgttcagtgcttctcccggtaccagatcacatgaagcagcatgacttcttcaagagcgccatgccgaaggctacgtgcaagaa  
aggactatcttcttcaaggtgacgggaactacaagacacgtgccgaagtcaagttcgaaggtgataccctggtgaaccgcatcgagctgaaagg  
tatcgatttcaaggaagatggaacatcctcggacacaagctggagtagaactacaactcccacaacgtatacatcatggccgacaagcagaaga  
acggcatcaaggtgaacttcaagatcaggcacaacatcgaagatggaagcgtgcaactggcggaccactaccagcagaacacgcccacatcggcgat  
ggcctgtcctgctgcccggacaaccattacctgtccacgcaatctgcctctccaaggacccaacgagaagaggaccacatggtcctgctgga  
gttcgtgacggctgctgggatcacgcatggcatggatgaactctacaagtga

atg ggc aag ggc gag gaa ctg ttc act ggc gtg gtc cca atc ctg gtg gaa ctg gat ggt

M G K G E E L F T G V V P I L V E L D G  
gat tga acg ggc aca agt tct ccg tca gcg gag agg gtg aag gtg atg cca cct acg gaa  
D - T G T S S P S A E R V K V M P P T E  
agc tca ccc tga agt tca tct gca cta ccg gaa agc tcc ctg ttc cgt ggc caa ccc tcg  
S S P - S S S A L P E S S L F R G Q P S  
tca cca ctt tca cct acg gtg ttc agt gct tct ccc ggt acc cag atc aca tga agc agc  
S P L S P T V F S A S P G T Q I T - S S  
atg act tct tca aga gcg cca tgc ccg aag gct acg tgc aag aaa gga cta tct tct tca  
M T S S R A P C P K A T C K K G L S S S  
agg atg acg gga act aca aga cac gtg ccg aag tca agt tgc aag gtg ata ccc tgg tga  
R M T G T T R H V P K S S S K V I P W -  
acc gca tgc agc tga aag gta tgc att tca agg aag atg gaa aca tcc tgc gac aca agc  
T A S S - K V S I S R K M E T S S D T S  
tgg agt aca act aca act ccc aca acg tat aca tca tgg ccg aca agc aga aga acg gca  
W S T T T P T T Y T S W P T S R R T A  
tca agg tga act tca aga tca ggc aca aca tgc aag atg gaa gcg tgc aac tgg cgg acc  
S R - T S R S G T T S K M E A C N W R T  
act acc agc aga aca cgc cca tgc gcg atg gcc ctg tcc tgc tgc cgg aca acc att acc  
T T S R T R P S A M A L S C C R T T I T

tgt cca cgc aat ctg ccc tct cca agg acc cca acg aga aga ggg acc aca tgg tcc tgc  
 C P R N L P S P R T P T R R G T T W S C  
 tgg agt tcg tga cgg ctg ctg gga tca cgc atg gca tgg atg aac tct aca agt  
 W S S - R L L G S R M A W M N S T S

**Allele 2: no indels**

atg ggc aag ggc gag gaa ctg ttc act ggc gtg gtc cca atc ctg gtg gaa ctg gat ggt  
 M G K G E E L F T G V V P I L V E L D G  
 gat gtg aac ggg cac aag ttc tcc gtc agc gga gag ggt gaa ggt gat gcc acc tac gga  
 D V N G H K F S V S G E G E G D A T Y G  
 aag ctc acc ctg aag ttc atc tgc act acc gga aag ctc cct gtt ccg tgg cca acc ctc  
 K L T L K F I C T T G K L P V P W P T L  
 gtc acc act ttc acc tac ggt gtt cag tgc ttc tcc ccg tac cca gat cac atg aag cag  
 V T T F T Y G V Q C F S R Y P D H M K Q  
 cat gac ttc ttc aag agc gcc atg ccc gaa ggc tac gtg caa gaa agg act atc ttc ttc  
 H D F F K S A M P E G Y V Q E R T I F F  
 aag gat gac ggg aac tac aag aca cgt gcc gaa gtc aag ttc gaa ggt gat acc ctg gtg  
 K D D G N Y K T R A E V K F E G D T L V  
 aac cgc atc gag ctg aaa ggt atc gat ttc aag gaa gat gga aac atc ctc gga cac aag  
 N R I E L K G I D F K E D G N I L G H K  
 ctg gag tac aac tac aac tcc cac aac gta tac atc atg gcc gac aag cag aag aac ggc  
 L E Y N Y N S H N V Y I M A D K Q K N G  
 atc aag gtg aac ttc aag atc agg cac aac atc gaa gat gga agc gtg caa ctg gcg gac  
 I K V N F K I R H N I E D G S V Q L A D  
 cac tac cag cag aac acg ccc act gcc gat ggc cct ctg ctg ccg gac aac cat tac  
 H Y Q Q N T P I G D G P V L L P D N H Y  
 ctg tcc acg caa tct gcc ctc tcc aag gac ccc aac gag aag agg gac cac atg gtc ctg  
 L S T Q S A L S K D P N E K R D H M V L  
 ctg gag ttc gtg acg gct gct ggg atc acg cat ggc atg gat gaa ctc tac aag tga  
 L E F V T A A G I T H G M D E L Y K -

**EC2 co-transforming event: biallelic**

**Allele 1: insertion of A**

AtgggcaaggggcgaggaaactgttcaactggcgtggtcccaatcctgggtggaactggatggtgatgAtgaaaggcacaagtctccgtcagcggag  
 aggggtgaaggtgatgccactacggaagctcaccctgaagttcatctgcactaccggaagctccctgttccgtggccaaccctcgtcaccact  
 ttcacctaagggtgttcagtgttctcccggtaccagatcacatgaagcagcatgacttctcaagagcgccatgccgaaggctacgtgcaaga  
 aaggactatcttcttcaaggatgacgggaactacaagacacgtgccaagtcgaagttcgaaggtgatccctggtgaaccgcatcgagctgaaag  
 gtatcgatttcaaggaagatgaaacatcctcggacacaagctggagtacaactccaactccacaacgtatacatcatggccgacaagcagaag  
 aacggcatcaaggtgaacttcaagatcaggcacaacatcgaagatggaagcgtgcaactggcggaccactaccagcagaacacgcccacatggcga  
 tggcctgtcctgctgctcgggacaaccattacctgtccacgcaatctgcctctccaaggaccccaacgagaagaggggaccacatgggtcctgctgtg  
 agttcgtgacggctgctgggatcacgcatggcatggatgaactctacaagtga

atg ggc aag ggc gag gaa ctg ttc act ggc gtg gtc cca atc ctg gtg gaa ctg gat ggt  
 M G K G E E L F T G V V P I L V E L D G  
 gat gat gaa cgg gca caa gtt ctc cgt cag cgg aga ggg tga agg tga tgc cac cta cgg  
 D D E R A Q V L R Q R R G - R - C H L R  
 aaa gct cac cct gaa gtt cat ctg cac tac cgg aaa gct ccc tgt tcc gtg gcc aac cct  
 K A H P E V H L H Y R K A P C S V A N P  
 cgt cac cac ttt cac cta cgg tgt tca gtg ctt ctc ccg gta ccc aga tca cat gaa gca  
 R H H F H L R C S V L L P V P R S H E A  
 gca tga ctt ctt caa gag cgc cat gcc cga agg cta cgt gca aga aag gac tat ctt ctt  
 A - L L Q E R H A R R L R A R K D Y L L  
 caa gga tga cgg gaa cta caa gac acg tgc cga agt caa gtt cga agg tga tac cct ggt  
 Q G - R E L Q D T C R S Q V R R - Y P G  
 gaa cgg cat cga gct gaa agg tat cga ttt caa gga aga tgg aaa cat cct cgg aca caa  
 E P H R A E R Y R F Q G R W K H P R T Q  
 gct gga gta caa cta caa ctc cca caa cgt ata cat cat gcc cga caa gca gaa gaa cgg  
 A G V Q L Q L P Q R I H H G R Q A E E R  
 cat caa ggt gaa ctt caa gat cag gca caa cat cga aga tgg aag cgt gca act ggc gga  
 H Q G E L Q D Q A Q H R R W K R A T G G  
 cca cta cca gca gaa cac gcc cat cgg cga tgg ccc tgt cct gct gcc gga caa cca tta  
 P L P A E H A H R R W P C P A A G Q P L  
 cct gtc cac gca atc tgc cct ctc caa gga ccc caa cga gaa gag gga cca cat ggt cct  
 P V H A I C P L Q G P Q R E E G P H G P  
 gct gga gtt cgt gac ggc tgc gat cac gca tgg cat gca tga act cta caa gtg  
 A G V R D G C W D H A W H G - T L Q V

**Allele 2: deletion of GA**

AtgggcaaggggcgaggaaactgttcaactggcgtggtcccaatcctgggtggaactggatggtgatgGAgaaggcacaagtctccgtcagcggag  
 agagggtgaaggtgatgccactacggaagctcaccctgaagttcatctgcactaccggaagctccctgttccgtggccaaccctcgtcacca  
 ctttaccctacgggtgttcagtgttctcccggtaccagatcacatgaagcagcatgacttcttcaagagcgccatgccgaaggctacgtgcaaa  
 gaaaggactatcttctcaaggatgacgggaactacaagacacgtgccaagtcgaagttcgaaggtgataccctggtgaaccgcatcgagctgaa  
 aggtatcgatttcaaggaagatgaaacatcctcggacacaagctggagtacaactacaactccacaacgtatacatcatggccgacaagcaga  
 agaacgcatcaaggtgaacttcaagatcaggcacaacatcgaagatggaagcgtgcaactggcggaccactaccagcagaacacgcccacatggc  
 gatggccctgtcctgctgctcgggacaaccattacctgtccacgcaatctgcctctccaaggaccccaacgagaagaggggaccacatgggtcctgct  
 ggagttcgtgacggctgctgggatcacgcatggcatggatgaactctacaagtga

atg ggc aag ggc gag gaa ctg ttc act ggc gtg gtc cca atc ctg gtg gaa ctg gat ggt  
M G K G E E L F T G V V P I L V E L D G  
gat gtg aga acg ggc aca agt tct ccg tca gcg gag agg gtg aag gtg atg cca cct acg  
D V R T G G T S S P S A E R V K V M P P T  
gaa agc tca ccc tga agt tca tct gca cta ccg gaa agc tcc ctg ttc cgt ggc caa ccc  
E S S P - S S S A L P E S S L F R G Q P  
tcg tca cca ctt tca cct acg gtg ttc agt gct tct ccc ggt acc cag atc aca tga agc  
S S P L S P T V F S A S P G T Q I T - S  
agc atg act tct tca aga gcg cca tgc ccg aag gct acg tgc aag aaa gga cta tct tct  
S M T S S R A P C P K A T C K K G L S S  
tca agg atg acg gga act aca aga cac gtg ccg aag tca agt tgc aag gtg ata ccc tgg  
S R M T G T T R H V P K S S S K V I P W  
tga acc gca tgc agc tga aag gta tgc att tca agg aag atg gaa aca tcc tgc gac aca  
- T A S S - K V S I S R K M E T S S D T  
agc tgg agt aca act aca act ccc aca acg tat aca tca tgg ccg aca agc aga aga acg  
S W S T T T P T Y T S W P T S R R T  
gca tca agg tga act tca aga tca ggc aca aca tgc aag atg gaa gcg tgc aac tgg cgg  
A S R - T S R S G T T S K M E A C N W R  
acc act acc agc aga aca cgc cca tgc gcg atg gcc ctg tcc tgc tgc cgg aca acc att  
T T T S R A P C P S A M A L S C C R T T I  
acc tgt cca cgc aat ctg ccc tct cca agg acc cca acg aga aga ggg acc aca tgg tcc  
T C P R N L P S P R T P T R R G T T W S  
tgc tgg agt tgc tga cgg ctg ctg gga tca cgc atg gca tgg atg aac tct aca agt  
C W S S - R L L G S R M A W M N S T S

**EC3 co-transforming event: biallelic**  
**Allele 1: deletion of ATGT**

Atgggcaaggcgaggaactgttcaactggtggtcccaatcctggtggaactggatggtg**ATCT**gaa**cg**ggcacaagtctccgctcagcggag  
aggggtaagggtgatgccacctacggaagctcaccctgaagttcatctgcactaccggaagctccctgttccggtggccaaccctcgtcaccact  
ttcacctacgggtgttcagtgcttctcccgttaccagatcacatgaagcagcatgacttcttcaagagcgcacatgcccgaaggctacgtgcaaga  
aaggactatcttcttcaaggtgacgggaactacaagacacgtgcccgaagtcaagttcgaaggtgataccctggtgaaccgcatcgagctgaaag  
gtatcgatttcaaggaagatggaacatcctcggacacaagctggagtacaactacaactcccacaacgtatacatcatggccgacaagcagaag  
aacggcatcaagggtgaacttcaagatcaggcacaacatcgaagatggaagcgtgcaactggcggaccactaccagcagaacacgcccacggtcga  
tggcctgtcctgctgcccggacaaccattacctgtccacgcaatctgcctctccaaggaccccaacgagaagaggggaccacatggtcctgctg  
agttcgtgacggctgctgggatcacgcatggcatggatgaactctacaagtga

atg ggc aag ggc gag gaa ctg ttc act ggc gtg gtc cca atc ctg gtg gaa ctg gat ggt  
M G K G E E L F T G V V P I L V E L D G  
gga acg ggc aca agt tct ccg tca gcg gag agg gtg aag gtg atg cca cct acg gaa agc  
G T G T S S P S A E R V K V M P P T E S  
tca ccc tga agt tca tct gca cta ccg gaa agc tcc ctg ttc cgt ggc caa ccc tgc tca  
S P - S S S A L P E S S L F R G Q P S S  
cca ctt tca cct acg gtg ttc agt gct tct ccc ggt acc cag atc aca tga agc agc atg  
P L S P T V F S A S P G T Q I T - S S M  
act tct tca aga gcg cca tgc ccg aag gct acg tgc aag aaa gga cta tct tct tca agg  
T S S R A P C P K A T C K K G L S S S R  
atg acg gga act aca aga cac gtg ccg aag tca agt tgc aag gtg ata ccc tgg tga acc  
M T G T T R H V P K S S S K V I P W - T  
gca tgc agc tga aag gta tgc att tca agg aag atg gaa aca tcc tgc gac aca agc tgg  
A S S - K V S I S R K M E T S S D T S W  
agt aca act aca act ccc aca acg tat aca tca tgg ccg aca agc aga aga acg gca tca  
S T T T T P T Y T S W P T S R R T A S  
agg tga act tca aga tca ggc aca aca tgc aag atg gaa gcg tgc aac tgg cgg acc act  
R - T S R S G T T S K M E A C N W R T T  
acc agc aga aca cgc cca tgc gcg atg gcc ctg tcc tgc tgc cgg aca acc att acc tgt  
T S R T R P S A M A L S C C R T T I T C  
cca cgc aat ctg ccc tct cca agg acc cca acg aga aga ggg acc aca tgg tcc tgc tgg  
P R N L P S P R T P T R R G T T W S C W  
agt tgc tga cgg ctg ctg gga tca cgc atg gca tgg atg aac tct aca agt  
S S - R L L G S R M A W M N S T S

**Allele 2: two deletions of G**

Atgggcaaggcgaggaactgttcaactggtggtcccaatcctggtggaactg**GatG**gtgatgtgaa**cg**ggcacaagtctccgctcagcggag  
aggggtaagggtgatgccacctacggaagctcaccctgaagttcatctgcactaccggaagctccctgttccggtggccaaccctcgtcaccact  
ttcacctacgggtgttcagtgcttctcccgttaccagatcacatgaagcagcatgacttcttcaagagcgcacatgcccgaaggctacgtgcaaga  
aaggactatcttcttcaaggtgacgggaactacaagacacgtgcccgaagtcaagttcgaaggtgataccctggtgaaccgcatcgagctgaaag  
gtatcgatttcaaggaagatggaacatcctcggacacaagctggagtacaactacaactcccacaacgtatacatcatggccgacaagcagaag  
aacggcatcaagggtgaacttcaagatcaggcacaacatcgaagatggaagcgtgcaactggcggaccactaccagcagaacacgcccacggtcga  
tggcctgtcctgctgcccggacaaccattacctgtccacgcaatctgcctctccaaggaccccaacgagaagaggggaccacatggtcctgctg  
agttcgtgacggctgctgggatcacgcatggcatggatgaactctacaagtga  
atg ggc aag ggc gag gaa ctg ttc act ggc gtg gtc cca atc ctg gtg gaa ctg atg tga  
M G K G E E L F T G V V P I L V E L M -  
tgt gaa cgg gca caa gtt ctc cgt cag cgg aga ggg tga agg tga tgc cac cta cgg aaa  
C E R A Q V L R Q R R G - R - C H L R K  
gct cac cct gaa gtt cat ctg cac tac cgg aaa gct ccc tgt tcc gtg gcc aac cct cgt  
A H P E V H L H Y R K A P C S V A N P R  
cac cac ttt cac cta cgg tgt tca gtg ctt ctc cgg gta ccc aga tca cat gaa gca gca  
H H F H L R C S V L L P V P R S H E A A

tga ctt ctt caa gag cgc cat gcc cga agg cta cgt gca aga aag gac tat ctt ctt caa  
 - L L Q E R H A R R L R A R K D Y L L Q  
 gga tga cgg gaa cta caa gac acg tgc cga agt caa gtt cga agg tga tac cct ggt gaa  
 G - R E L Q D T C R S Q V R R - Y P G E  
 ccg cat cga gct gaa agg tat cga ttt caa gga aga tgg aaa cat cct cgg aca caa gct  
 P H R A E R Y R F Q G R W K H P R T Q A  
 gga gta caa cta caa ctc cca caa cgt ata cat cat ggc cga caa gca gaa gaa cgg cat  
 G V Q L Q L P Q R I H H G R Q A E E R H  
 caa ggt gaa ctt caa gat cag gca caa cat cga aga tgg aag cgt gca act ggc gga cca  
 Q G E L Q D Q A Q H R R W K R A T G G P  
 cta cca gca gaa cac gcc cat cgg cga tgg ccc tgt cct gct gcc gga caa cca tta cct  
 L P A E H A H R R W P C P A A G Q P L P  
 gtc cac gca atc tgc cct ctc caa gga ccc caa cga gaa gag gga cca cat ggt cct gct  
 V H A I C P L Q G P Q R E E G P H G P A  
 gga gtt cgt gac ggc tgc tgg gat cac gca tgg cat gga tga act cta caa gtt  
 G V R D G C W D H A W H G - T L Q V

**EC4 co-transforming event: biallelic**

**Allele 1: deletion of G**

AtggggcaagggcgaggaaactgttcaactggcgtggtcccaatcctgggtggaactggatggtgatGtgaaaggcacaagttctccgtcagcgggaga  
 ggggtgaaggtgatgccacctacggaaagctcaccctgaagttcatctgcactaccggaagctccctgttccgtggccaaccctcgtcaccactt  
 tcacctacgggtgttcagtgcttctcccggtaccagatcacatgaagcagcatgacttcttcaagagcgccatgccgaaggtactcgtgcaagaa  
 aggactatcttcttcaaggtgacgggaactacaagacagctgccgaagtcaagttcgaaggtgataccctggtgaaccgcatcgagctgaaagg  
 tatcgatttcaaggaagatggaaacatcctcggacacaagctggagtacaactacaactcccacaacgtatacatcatggccgacaagcagaaga  
 acggcatcaaggtgaaacttcaagatcaggcacaacatcgaagatggaagcgtgcaactggcggaccactaccagcagaacacgcccacgtgggat  
 ggccctgtcctgtgctgcccggacaaccattaccctgtccacgcaatctgcctctccaaggaccccaacgagaagagggaccacatggtcctgctgga  
 gttcgtgacggctgctgggatcacgcatggcatggatgaaactctacaagtga

atg ggc aag ggc gag gaa ctg ttc act ggc gtg gtc cca atc ctg gtg gaa ctg gat ggt  
 M G K G E E L F T G V V P I L V E L D G  
 gat tga acg ggc aca agt tct ccg tca gcg gag agg gtg aag gtg atg cca cct acg gaa  
 D - T G T S S P S A E R V K V M P P T E  
 agc tca ccc tga agt tca tct gca cta ccg gaa agc tcc ctg ttc cgt ggc caa ccc tgc  
 S S P - S S S A L P E S S L F R G Q P S  
 tca cca ctt tca cct acg gtg ttc agt gct tct ccc ggt acc cag atc aca tga agc agc  
 S P L S P T V F S A S P G T Q I T - S S  
 atg act tct tca aga ggc cca tgc ccg aag gct acg tgc aag aaa gga cta tct tct tca  
 M T S S R A P C P K A T C K K G L S S S  
 agg atg acg gga act aca aga cac gtg ccg aag tca agt tgc aag gtg ata ccc tgg tga  
 R M T G T T R H V P K S S S K V I P W -  
 acc gca tgc agc tga aag gta tgc att tca agg aag atg gaa aca tcc tgc gac aca agc  
 T A S S - K V S I S R A K M E T S S D T S  
 tgg agt aca act aca act ccc aca acg tat aca tca tgg ccg aca agc aga aga acg gca  
 W S T T T T P T T Y T S W P T S R R T A  
 tca agg tga act tca aga tca ggc aca aca tgc aag atg gaa gcg tgc aac tgg cgg acc  
 S R - T S R S G T T S K M E A C N W R T  
 act acc agc aga aca cgc cca tgc ggc atg gcc ctg tcc tgc tgc cgg aca acc att acc  
 T T S R T R P S A M A L S C C R T T I T  
 tgt cca cgc aat ctg ccc tct cca agg acc cca acg aga aga ggg acc aca tgg tcc tgc  
 C P R N L P S P R T P T R R G T T W S C  
 tgg agt tgc tga cgg ctg gga tca cgc atg gca tgg atg aac tct aca agt  
 W S S - R L L G S R M A W M N S T S

**Allele 2: insertion of A**

AtggggcaagggcgaggaaactgttcaactggcgtggtcccaatcctgggtggaactggatggtgatGtgaaaggcacaagttctccgtcagcggag  
 atgggtgaaggtgatgccacctacggaaagctcaccctgaagttcatctgcactaccggaagctccctgttccgtggccaaccctcgtcaccact  
 tcacctacgggtgttcagtgcttctcccggtaccagatcacatgaagcagcatgacttcttcaagagcgccatgccgaaggtactcgtgcaagaa  
 aaggactatcttcttcaaggtgacgggaactacaagacacgctgccgaagtcaagttcgaaggtgataccctggtgaaccgcatcgagctgaaag  
 gtatcgatttcaaggaagatggaaacatcctcggacacaagctggagtacaactacaactcccacaacgtatacatcatggccgacaagcagaag  
 aacggcatcaaggtgaaacttcaagatcaggcacaacatcgaagatggaagcgtgcaactggcggaccactaccagcagaacacgcccacgtggcga  
 tggccctgtcctgtgcccggacaaccattaccctgtccacgcaatctgcctctccaaggaccccaacgagaagagggaccacatggtcctgctgctg  
 agttcgtgacggctgctgggatcacgcatggcatggatgaaactctacaagtga

atg ggc aag ggc gag gaa ctg ttc act ggc gtg gtc cca atc ctg gtg gaa ctg gat ggt  
 M G K G E E L F T G V V P I L V E L D G  
 gat gta gaa cgg gca caa gtt ctc cgt cag cgg aga ggg tga agg tga tgc cac cta cgg  
 D V E R A Q V L R Q R R G - R - C H L R  
 aaa gct cac cct gaa gtt cat ctg cac tac cgg aaa gct ccc tgt tcc gtg gcc aac cct  
 K A H P E V H L H Y R K A P C S V A N P  
 cgt cac cac ttt cac cta cgg tgt tca gtg ctt ctc ccg gta ccc aga tca cat gaa gca  
 R H H F H L R C S V L L P V P R S H E A  
 gca tga ctt ctt caa gag cgc cat gcc cga agg cta cgt gca aga aag gac tat ctt ctt  
 A - L L Q E R H A R R L R A R K D Y L L  
 caa gga tga cgg gaa cta caa gac acg tgc cga agt caa gtt cga agg tga tac cct ggt  
 Q G - R E L Q D T C R S Q V R R - Y P G  
 gaa ccg cat cga gct gaa agg tat cga ttt caa gga aga tgg aaa cat cct cgg aca caa  
 E P H R A E R Y R F Q G R W K H P R T Q  
 gct gga gta caa cta caa ctc cca caa cgt ata cat cat ggc cga caa gca gaa gaa cgg

A G V Q L Q L P Q R I H H G R Q A E E R  
 cat caa ggt gaa ctt caa gat cag gca caa cat cga aga tgg aag cgt gca act ggc gga  
 H Q G E L Q D Q A Q H R R W K R A T G G  
 cca cta cca gca gaa cac gcc cat cgg cga tgg ccc tgt cct gct gcc gga caa cca tta  
 P L P A E H A H R R W P C P A A G Q P L  
 cct gtc cac gca atc tgc cct ctc caa gga ccc caa cga gaa gag gga cca cat ggt cct  
 P V H A I C P L Q G C P Q R E E G P H G P  
 gct gga gtt cgt gac ggc tgc tgg gat cac gca tgg cat gga tga act cta caa gtg  
 A G V R D G C W D H A W H G - T L Q V

**EC5 co-transforming event: biallelic**

**Allele 1: deletion of G**

AtggggcaaggcgaggaactgttcactggcgtggtcccaatcctgggtggaactggatggtgatGtgaaacggggcacaagttctccgtcagcgggaga  
 ggggtgaaggatgatgccacctacggaaagctcaccctgaagttcatctgcactaccggaaagctccctgttccgtggccaaccctcgtcaccactt  
 tcacctcaggttccagtgcttctcccggtaccagatcacatgaagcagcatgacttctcaagagcgcctatgccgaaggctacgtgcaaga  
 aggactatcttcttcaaggatgacgggaactacaagacacgtgccgaagtcaagttcgaagggtgataccctggtgaaccgcatcgagctgaaagg  
 tatcgatttcaaggaagatggaaacatcctcggacacaagctggagtacaactacaactcccacaacgtatacatcatggccgacaagcagaaga  
 acggcatcaaggatgaaactcaagatcagggcacaacatcgaagatggaagcgtgcaactggcggaccactaccagcagaacacgcccacatcggcgat  
 ggcctgtcctgtgctcgggacaaccattacctgtccacgcaatctgcctctccaaggacccaacgagaagaggggaccacatggtcctgctgga  
 gttcgtgacggctgctggatcacgcatggcatggatgactctacaagtga

|     |     |     |     |     |     |     |     |     |     |     |     |     |     |     |     |     |     |     |     |
|-----|-----|-----|-----|-----|-----|-----|-----|-----|-----|-----|-----|-----|-----|-----|-----|-----|-----|-----|-----|
| atg | ggc | aag | ggc | gag | gaa | ctg | ttc | act | ggc | gtg | gtc | cca | atc | ctg | gtg | gaa | ctg | gat | ggt |
| M   | G   | K   | G   | E   | E   | L   | F   | T   | G   | V   | V   | P   | I   | L   | V   | E   | L   | D   | G   |
| gat | tga | acg | ggc | aca | agt | tct | ccg | tca | gcg | gag | agg | gtg | aag | gtg | atg | cca | cct | acg | gaa |
| D   | -   | T   | G   | T   | S   | S   | P   | S   | A   | E   | R   | V   | K   | V   | M   | P   | P   | T   | E   |
| agc | tca | ccc | tga | agt | tca | tct | gca | cta | ccg | gaa | agc | tcc | ctg | ttc | cgt | ggc | caa | ccc | tcg |
| S   | S   | P   | -   | S   | S   | S   | A   | L   | P   | E   | S   | S   | L   | F   | R   | G   | Q   | P   | S   |
| tca | cca | ctt | tca | cct | acg | gtg | ttc | agt | tct | tct | ccc | ggc | acc | cag | atc | aca | tga | agc | agc |
| S   | P   | L   | S   | P   | T   | V   | F   | S   | A   | S   | P   | G   | T   | Q   | I   | T   | -   | S   | S   |
| atg | act | tct | tca | aga | gcg | cca | tgc | ccg | aag | gct | acg | tgc | aag | aaa | gga | cta | tct | tct | tca |
| M   | T   | S   | S   | R   | A   | P   | C   | P   | K   | A   | T   | C   | K   | K   | G   | L   | S   | S   | S   |
| agg | atg | acg | gga | act | aca | aga | cac | gtg | ccg | aag | tca | agt | tcg | aag | gtg | ata | ccc | tgg | tga |
| R   | M   | T   | G   | T   | T   | R   | H   | V   | P   | K   | S   | S   | S   | K   | V   | I   | P   | W   | -   |
| acc | gca | tcg | agc | tga | aag | gta | tcg | att | tca | agg | aag | atg | gaa | aca | tcc | tcg | gac | aca | agc |
| T   | A   | S   | S   | -   | K   | V   | S   | I   | S   | R   | K   | M   | E   | T   | S   | S   | D   | T   | S   |
| tgg | agt | aca | act | aca | act | ccc | aca | acg | tat | aca | tca | tgg | ccg | aca | agc | aga | aga | acg | gca |
| W   | S   | T   | T   | T   | T   | P   | T   | T   | Y   | T   | S   | W   | P   | T   | S   | R   | R   | T   | A   |
| tca | agg | tga | act | tca | aga | tca | ggc | aca | aca | tcg | aag | atg | gaa | gcg | tgc | aac | tgg | cgg | acc |
| S   | R   | -   | T   | S   | R   | S   | G   | T   | T   | S   | K   | M   | E   | A   | C   | N   | W   | R   | T   |
| act | acc | agc | aga | aca | cgc | cca | tcg | gcg | atg | gcc | ctg | tcc | tgc | tgc | cgg | aca | acc | att | acc |
| T   | T   | S   | R   | T   | R   | P   | S   | A   | M   | A   | L   | S   | C   | C   | R   | T   | T   | I   | T   |
| tgt | cca | cgc | aat | ctg | ccc | tct | cca | agg | acc | cca | acg | aga | aga | ggg | acc | aca | tgg | tcc | tgc |
| C   | P   | R   | N   | L   | P   | S   | P   | R   | T   | P   | T   | R   | R   | G   | T   | T   | W   | S   | C   |
| tgg | agt | tcg | tga | cgg | ctg | ctg | gga | tca | cgc | atg | gca | tgg | atg | aac | tct | aca | agt |     |     |
| W   | S   | S   | -   | R   | L   | L   | G   | S   | R   | M   | A   | W   | M   | N   | S   | T   | S   |     |     |

**Allele 2: deletions of GT**

AtggggcaaggcgaggaactgttcactggcgtggtcccaatcctgggtggaactggatggtgatGTgaaacggggcacaagttctccgtcagcgggag  
 aggggtgaaggatgatgccacctacggaaagctcaccctgaagttcatctgcactaccggaaagctccctgttccgtggccaaccctcgtcaccact  
 ttcacctcaggttccagtgcttctcccggtaccagatcacatgaagcagcatgacttctcaagagcgcctatgccccaaggtacgtgcaaga  
 aaggactatcttcttcaaggatgacgggaactacaagacacgtgccgaagtcaagttcgaagggtgataccctggtgaaccgcatcgagctgaaag  
 gtatcgatttcaaggaagatggaacatcctcggacacaagctggagtacaactacaactcccacaacgtatacatatggccgacaagcagaag  
 aacggcatcaaggatgaaacttcaagatcagggcacaacatcgaagatggaagcgtgcaactggcggaccactaccagcagaacacgcccacatcggcga  
 tggcctgtcctgctgctcgggacaaccattacctgtccacgcaatctgcctctccaaggacccaacgagaagaggggaccacatggtcctgctgga  
 agttcgtgacggctgctgggatcacgcatggcatggatgactctacaagtga

|     |     |     |     |     |     |     |     |     |     |     |     |     |     |     |     |     |     |     |     |
|-----|-----|-----|-----|-----|-----|-----|-----|-----|-----|-----|-----|-----|-----|-----|-----|-----|-----|-----|-----|
| atg | ggc | aag | ggc | gag | gaa | ctg | ttc | act | ggc | gtg | gtc | cca | atc | ctg | gtg | gaa | ctg | gat | ggt |
| M   | G   | K   | G   | E   | E   | L   | F   | T   | G   | V   | V   | P   | I   | L   | V   | E   | L   | D   | G   |
| gat | gaa | cgg | gca | caa | ggt | ctc | cgt | cag | cgg | aga | ggg | tga | agg | tga | tgc | cac | cta | cgg | aaa |
| D   | E   | R   | A   | Q   | V   | L   | R   | Q   | R   | R   | G   | -   | R   | -   | C   | H   | L   | R   | K   |
| gct | cac | cct | gaa | ggt | cat | ctg | cac | tac | cgg | aaa | gct | ccc | tgt | tcc | gtg | gcc | aac | cct | cgt |
| A   | H   | P   | E   | V   | H   | L   | H   | Y   | R   | K   | A   | P   | C   | S   | V   | A   | N   | P   | R   |
| cac | cac | ttt | cac | cta | cgg | tgt | tca | gtg | ctt | ctc | ccg | gta | ccc | aga | tca | cat | gaa | gca | gca |
| H   | H   | F   | H   | L   | R   | C   | S   | V   | L   | L   | P   | V   | P   | R   | S   | H   | E   | A   | A   |
| tga | ctt | ctt | caa | gag | cgc | cat | gcc | cga | agg | cta | cgt | gca | aga | aag | gac | tat | ctt | ctt | caa |
| -   | L   | L   | Q   | E   | R   | H   | A   | R   | L   | R   | A   | R   | K   | D   | Y   | L   | L   | Q   |     |
| gga | tga | cgg | gaa | cta | caa | gac | acg | tgc | cga | agt | caa | ggt | cga | agg | tga | tac | cct | ggt | gaa |
| G   | -   | R   | E   | L   | Q   | D   | T   | C   | R   | S   | Q   | V   | R   | R   | -   | Y   | P   | G   | E   |
| ccg | cat | cga | gct | gaa | agg | tat | cga | ttt | caa | gga | aga | tgg | aaa | cat | cct | cgg | aca | caa | gct |
| P   | H   | R   | A   | E   | R   | Y   | R   | F   | Q   | G   | R   | W   | K   | H   | P   | R   | T   | Q   | A   |
| gga | gta | caa | cta | caa | ctc | caa | cgt | ata | cat | cat | ggc | cga | caa | gca | gaa | gaa | cgg | cat |     |
| G   | V   | Q   | L   | Q   | L   | P   | Q   | R   | I   | H   | H   | G   | R   | Q   | A   | E   | E   | R   | H   |
| caa | ggt | gaa | ctt | caa | gat | cag | gca | caa | cat | cga | aga | tgg | aag | cgt | gca | act | ggc | gga | cca |
| Q   | G   | E   | L   | Q   | D   | Q   | A   | Q   | H   | R   | R   | W   | K   | R   | A   | T   | G   | G   | P   |
| cta | cca | gca | gaa | cac | gcc | cat | cgg | cga | tgg | ccc | tgt | cct | gct | gcc | gga | caa | cca | tta | cct |
| L   | P   | A   | E   | H   | A   | H   | R   | R   | W   | P   | C   | P   | A   | A   | G   | Q   | P   | L   | P   |
| gtc | cac | gca | atc | tgc | cct | ctc | caa | gga | ccc | caa | cga | gaa | gag | gga | cca | cat | ggt | cct | gct |
| V   | H   | A   | I   | C   | P   | L   | Q   | G   | P   | Q   | R   | E   | E   | G   | P   | H   | G   | P   | A   |

gga gtt cgt gac ggc tgc tgg gat cac gca tgg cat gga tga act cta caa gtg  
G V R D G C W D H A W H G - T L Q V

**EC6 co-transforming event: biallelic**  
**Allele 1: deletion of TG**

AtgggcaaggcgaggaactgttcaactggcgtgggtcccaatcctgggtggaactggatgggtgatgTGaa<sup>cg</sup>gcacaagttctccgtcagcggag  
agggtgaaggatgatgccacctacggaagctcaccctgaagttcatctgcactaccggaagctccctgttccgtggccaaccctcgtcaccact  
ttcacctacgggtgttcagtgttctcccggtaccagatcacatgaagcagcatgacttcttcaagagcgcacatgcccgaaggctacgtgcaaga  
aaggactatcttcttcaaggatgacgggaactacaagacacgtgcccgaagtcaagttcgaaggtgataccctgggtaaccgcatcgagctgaaag  
gtatcgatttcaaggaagatggaacatcctcggacacaagctggagtacaactacaactcccacaacgtatacatcatggccgacaagcagaag  
aacggcatcaagggtgaacttcaagatcaggcacaacatcgaagatggaagcgtgcaactggcggaccactaccagcagaacacgcccacatcggcga  
tggcctgtcctgctgcccggacaaccattacctgtccacgcaatctgcctctccaaggaccccaacgagaagaggggaccacatggctcctgctg  
agttcgtgacggctgctgggatcacgcatggcatggatgaaactctacaagtga

|     |     |     |     |     |     |     |     |     |     |     |     |     |     |     |     |     |     |     |     |
|-----|-----|-----|-----|-----|-----|-----|-----|-----|-----|-----|-----|-----|-----|-----|-----|-----|-----|-----|-----|
| atg | ggc | aag | ggc | gag | gaa | ctg | ttc | act | ggc | gtg | gtc | cca | atc | ctg | gtg | gaa | ctg | gat | ggg |
| M   | G   | K   | G   | E   | E   | L   | F   | T   | G   | V   | V   | P   | I   | L   | V   | E   | L   | D   | G   |
| gat | gaa | cg  | gca | caa | g   | ttc | ctc | cgt | cag | agg | aga | ggg | tga | agg | tga | tgc | cac | cta | cg  |
| D   | E   | R   | A   | Q   | V   | L   | R   | Q   | R   | R   | G   | -   | R   | -   | C   | H   | L   | R   | K   |
| gct | cac | cct | gaa | g   | ttc | cat | ctg | cac | tac | cg  | aaa | gct | ccc | tgt | tcc | gtg | gcc | aac | cct |
| A   | H   | P   | E   | V   | H   | L   | H   | Y   | R   | K   | A   | P   | C   | S   | V   | A   | N   | P   | R   |
| cac | cac | ttt | cac | cta | cg  | tgt | tca | gtg | ctt | ctc | ccg | gta | ccc | aga | tca | cat | gaa | gca | gca |
| H   | H   | F   | H   | L   | R   | C   | S   | V   | L   | L   | P   | V   | P   | R   | S   | H   | E   | A   | A   |
| tga | ctt | ctt | caa | gag | cg  | cat | gcc | cga | agg | cta | cgt | gca | aga | aag | gac | tat | ctt | ctt | caa |
| -   | L   | L   | Q   | E   | R   | H   | A   | R   | R   | L   | R   | A   | R   | K   | D   | Y   | L   | L   | Q   |
| gga | tga | cg  | gaa | cta | caa | gac | acg | tgc | cga | agt | caa | g   | ttc | cga | agg | tga | tac | cct | gg  |
| G   | -   | R   | E   | L   | Q   | D   | T   | C   | R   | S   | Q   | V   | R   | R   | -   | Y   | P   | G   | E   |
| ccg | cat | cga | gct | gaa | agg | tat | cga | ttt | caa | gga | aga | tgg | aaa | cat | cct | cg  | aca | caa | gct |
| P   | H   | R   | A   | E   | R   | Y   | R   | F   | Q   | G   | R   | W   | K   | H   | P   | R   | T   | Q   | A   |
| gga | gta | caa | cta | caa | ctc | cca | caa | cgt | ata | cat | cat | ggc | cga | caa | gca | gaa | gaa | cg  | cat |
| G   | V   | Q   | L   | Q   | L   | P   | Q   | R   | I   | H   | H   | G   | R   | Q   | A   | E   | E   | R   | H   |
| caa | gg  | gaa | ctt | caa | gat | cag | gca | caa | cat | cga | aga | tgg | aag | cgt | gca | act | ggc | gga | cca |
| Q   | G   | E   | L   | Q   | D   | Q   | A   | Q   | H   | R   | R   | W   | K   | R   | A   | T   | G   | G   | P   |
| cta | cca | gca | gaa | cac | gcc | cat | cg  | cga | tgg | ccc | tgt | cct | gct | gcc | gga | caa | cca | tta | cct |
| L   | P   | A   | E   | H   | A   | H   | R   | R   | W   | P   | C   | P   | A   | A   | G   | Q   | P   | L   | P   |
| gtc | cac | gca | atc | tgc | cct | ctc | caa | gga | ccc | caa | cga | gaa | gag | gga | cca | cat | gg  | cct | gct |
| V   | H   | A   | I   | C   | P   | L   | Q   | G   | P   | Q   | R   | E   | E   | G   | P   | H   | G   | P   | A   |
| gga | g   | ttc | cg  | gac | ggc | tgc | tgg | gat | cac | gca | tgg | cat | gga | tga | act | cta | caa | gtg |     |
| G   | V   | R   | D   | G   | C   | W   | D   | H   | A   | W   | H   | G   | -   | T   | L   | Q   | V   |     |     |

**Allele 2: insertion of T**

AtgggcaaggcgaggaactgttcaactggcgtgggtcccaatcctgggtggaactggatgggtgatgT<sup>tgaa</sup><sup>cg</sup>gcacaagttctccgtcagcggag  
agggtgaaggatgatgccacctacggaagctcaccctgaagttcatctgcactaccggaagctccctgttccgtggccaaccctcgtcaccact  
ttcacctacgggtgttcagtgttctcccggtaccagatcacatgaagcagcatgacttcttcaagagcgcacatgcccgaaggctacgtgcaaga  
aaggactatcttcttcaaggatgacgggaactacaagacacgtgcccgaagtcaagttcgaaggtgataccctgggtaaccgcatcgagctgaaag  
gtatcgatttcaaggaagatggaacatcctcggacacaagctggagtacaactacaactcccacaacgtatacatcatggccgacaagcagaag  
aacggcatcaagggtgaacttcaagatcaggcacaacatcgaagatggaagcgtgcaactggcggaccactaccagcagaacacgcccacatcggcga  
tggcctgtcctgctgcccggacaaccattacctgtccacgcaatctgcctctccaaggaccccaacgagaagaggggaccacatggctcctgctg  
agttcgtgacggctgctgggatcacgcatggcatggatgaaactctacaagtga

|     |     |     |     |     |     |     |     |     |     |     |     |     |     |     |     |     |     |     |     |
|-----|-----|-----|-----|-----|-----|-----|-----|-----|-----|-----|-----|-----|-----|-----|-----|-----|-----|-----|-----|
| atg | ggc | aag | ggc | gag | gaa | ctg | ttc | act | ggc | gtg | gtc | cca | atc | ctg | gtg | gaa | ctg | gat | ggg |
| M   | G   | K   | G   | E   | E   | L   | F   | T   | G   | V   | V   | P   | I   | L   | V   | E   | L   | D   | G   |
| gat | g   | ttc | cg  | gca | caa | g   | ttc | ctc | cgt | cag | agg | aga | ggg | tga | agg | tga | tgc | cac | cta |
| D   | V   | E   | R   | A   | Q   | V   | L   | R   | Q   | R   | R   | G   | -   | R   | -   | C   | H   | L   | R   |
| aaa | gct | cac | cct | gaa | g   | ttc | cat | ctg | cac | tac | cg  | aaa | gct | ccc | tgt | tcc | gtg | gcc | aac |
| K   | A   | H   | P   | E   | V   | H   | L   | H   | Y   | R   | K   | A   | P   | C   | S   | V   | A   | N   | P   |
| cgt | cac | cac | ttt | cac | cta | cg  | tgt | tca | gtg | ctt | ctc | ccg | gta | ccc | aga | tca | cat | gaa | gca |
| R   | H   | H   | F   | H   | L   | R   | C   | S   | V   | L   | L   | P   | V   | P   | R   | S   | H   | E   | A   |
| gca | tga | ctt | ctt | caa | gag | cg  | cat | gcc | cga | agg | cta | cgt | gca | aga | aag | gac | tat | ctt | ctt |
| A   | -   | L   | L   | Q   | E   | R   | H   | A   | R   | R   | L   | R   | A   | R   | K   | D   | Y   | L   | L   |
| caa | gga | tga | cg  | gaa | cta | caa | gac | acg | tgc | cga | agt | caa | g   | ttc | cga | agg | tga | tac | cct |
| Q   | G   | -   | R   | E   | L   | Q   | D   | T   | C   | R   | S   | Q   | V   | R   | R   | -   | Y   | P   | G   |
| gaa | ccg | cat | cga | gct | gaa | agg | tat | cga | ttt | caa | gga | aga | tgg | aaa | cat | cct | cg  | aca | caa |
| E   | P   | H   | R   | A   | E   | R   | Y   | R   | F   | Q   | G   | R   | W   | K   | H   | P   | R   | T   | Q   |
| gct | gga | gta | caa | cta | caa | ctc | cca | caa | cgt | ata | cat | cat | ggc | cga | caa | gca | gaa | gaa | cg  |
| A   | G   | V   | Q   | L   | Q   | L   | P   | Q   | R   | I   | H   | H   | G   | R   | Q   | A   | E   | E   | R   |
| cat | caa | gg  | gaa | ctt | caa | gat | cag | gca | caa | cat | cga | aga | tgg | aag | cgt | gca | act | ggc | gga |
| H   | Q   | G   | E   | L   | Q   | D   | Q   | A   | Q   | H   | R   | R   | W   | K   | R   | A   | T   | G   | G   |
| cca | cta | cca | gca | gaa | cac | gcc | cat | cg  | cga | tgg | ccc | tgt | cct | gct | gcc | gga | caa | cca | tta |
| P   | L   | P   | A   | E   | H   | A   | H   | R   | R   | W   | P   | C   | P   | A   | A   | G   | Q   | P   | L   |
| cct | gtc | cac | gca | atc | tgc | cct | ctc | caa | gga | ccc | caa | cga | gaa | gag | gga | cca | cat | gg  | c   |
| P   | V   | H   | A   | I   | C   | P   | L   | Q   | G   | P   | Q   | R   | E   | E   | G   | P   | H   | G   | P   |
| gct | gga | g   | ttc | cg  | gac | ggc | tgc | tgg | gat | cac | gca | tgg | cat | gga | tga | act | cta | caa | gtg |
| A   | G   | V   | R   | D   | G   | C   | W   | D   | H   | A   | W   | H   | G   | -   | T   | L   | Q   | V   |     |

**EC7 co-transforming event: monoallelic**  
**Allele 1: no indels**

AtgggcaaggcgaggaactgttcaactggcgtgggtcccaatcctgggtggaactggatgggtgatgT<sup>tgaa</sup><sup>cg</sup>gcacaagttctccgtcagcggaga  
gggtgaaggatgatgccacctacggaagctcaccctgaagttcatctgcactaccggaagctccctgttccgtggccaaccctcgtcaccact

tcacctacgggtggttcagtgcttctcccggtaaccagatcacatgaagcagcatgacttcttcaagagcgccatgccgaaggctacgtgcaagaa  
 aggactatcttcttcaaggatgacgggaactacaagacacgtgccgaagtcaagttcgaagggtgataccctgggaaccgcacatcgagctgaaagg  
 tatcgatttcaaggaagatggaacatcctcggacacaagctggagtacaactacaactcccacaacgtatacatcatgcccgaacgagaaga  
 acggcatcaagggtgaacttcaagatcaggcacaacatcgaagatggaagcgtgcaactggcggaccactaccagcagaacaagccatcgggcat  
 ggcctgtcctgctgcccggacaaccattacctgtccacgcaatctgcctctccaaggacccaacgagaagagggaccacatggtcctgctgga  
 gttcgtgacggctgctgggatcacgcatggcatggatgaactctacaagtga

|     |     |     |     |     |     |     |     |     |     |     |     |     |     |     |     |     |     |     |     |
|-----|-----|-----|-----|-----|-----|-----|-----|-----|-----|-----|-----|-----|-----|-----|-----|-----|-----|-----|-----|
| atg | ggc | aag | ggc | gag | gaa | ctg | ttc | act | ggc | gtg | gtc | cca | atc | ctg | gtg | gaa | ctg | gat | ggt |
| M   | G   | K   | G   | E   | E   | L   | F   | T   | G   | V   | V   | P   | I   | L   | V   | E   | L   | D   | G   |
| gat | gtg | aac | ggg | cac | aag | ttc | tcc | gtc | agc | gga | gag | ggt | gaa | ggt | gat | gcc | acc | tac | gga |
| D   | V   | N   | G   | H   | K   | F   | S   | V   | S   | G   | E   | G   | E   | G   | D   | A   | T   | Y   | G   |
| aag | ctc | acc | ctg | aag | ttc | atc | tgc | act | acc | gga | aag | ctc | cct | ggt | ccg | tgg | cca | acc | ctc |
| K   | L   | T   | L   | K   | F   | I   | C   | T   | T   | G   | K   | L   | P   | V   | P   | W   | P   | T   | L   |
| gtc | acc | act | ttc | acc | tac | ggt | gtt | cag | tgc | ttc | tcc | cgg | tac | cca | gat | cac | atg | aag | cag |
| V   | T   | T   | F   | T   | Y   | G   | V   | Q   | C   | F   | S   | R   | Y   | P   | D   | H   | M   | K   | Q   |
| cat | gac | ttc | ttc | aag | agc | gcc | atg | ccc | gaa | ggc | tac | gtg | caa | gaa | agg | act | atc | ttc | ttc |
| H   | D   | F   | F   | K   | S   | A   | M   | P   | E   | G   | Y   | V   | Q   | E   | R   | T   | I   | F   | F   |
| aag | gat | gac | ggg | aac | tac | aag | aca | cgt | gcc | gaa | gtc | aag | ttc | gaa | ggt | gat | acc | ctg | gtg |
| K   | D   | D   | G   | N   | Y   | K   | T   | R   | A   | E   | V   | K   | F   | E   | G   | D   | T   | L   | V   |
| aac | cgc | atc | gag | ctg | aaa | ggt | atc | gat | ttc | aag | gaa | gat | gga | aac | atc | ctc | gga | cac | aag |
| N   | R   | I   | E   | L   | K   | G   | I   | D   | F   | K   | E   | D   | G   | N   | I   | L   | G   | H   | K   |
| ctg | gag | tac | aac | tac | aac | tcc | cac | aac | gta | tac | atc | atg | gcc | gac | aag | cag | aag | aac | ggc |
| L   | E   | Y   | N   | Y   | N   | S   | H   | N   | V   | Y   | I   | M   | A   | D   | K   | Q   | K   | N   | G   |
| atc | aag | gtg | aac | ttc | aag | atc | agg | cac | aac | atc | gaa | gat | gga | agc | gtg | caa | ctg | gcg | gac |
| I   | K   | V   | N   | F   | K   | I   | R   | H   | N   | I   | E   | D   | G   | S   | V   | Q   | L   | A   | D   |
| cac | tac | cag | cag | aac | acg | ccc | atc | ggc | gat | ggc | cct | gtc | ctg | ctg | ccg | gac | aac | cat | tac |
| H   | Y   | Q   | Q   | N   | T   | P   | I   | G   | D   | G   | P   | V   | L   | L   | P   | D   | N   | H   | Y   |
| ctg | tcc | acg | caa | tct | gcc | ctc | tcc | aag | gac | ccc | aac | gag | aag | agg | gac | cac | atg | gtc | ctg |
| L   | S   | T   | Q   | S   | A   | L   | S   | K   | D   | P   | N   | E   | K   | R   | D   | H   | M   | V   | L   |
| ctg | gag | ttc | gtg | acg | gct | gct | ggg | atc | acg | cat | ggc | atg | gat | gaa | ctc | tac | aag | tga |     |
| L   | E   | F   | V   | T   | A   | A   | G   | I   | T   | H   | G   | M   | D   | E   | L   | Y   | K   | -   |     |

**Allele 2: deletion of TG**

AtgggcaaggggcgaggaactgttcaactggcgtgggtcccaatcctgggtggaactggatggtgatgTGaacgggcacaaagtctccgctcagcggag  
 aggggtgaaggatgacccctacggaagctcaccctgaagttcatctgactaccggaaagctccctgttccggtggccaaccctcgtcaccact  
 ttacctacgggtgttcagtgcttctcccggtaaccagatcacatgaagcagcatgacttcttcaagagcgccatgccgaaggctacgtgcaaga  
 aaggactatcttcttcaaggatgacgggaactacaagacacgtgccgaagtcaagttcgaagggtgataccctgggaaccgcacatcgagctgaaag  
 gtatcgatttcaaggaagatggaacatcctcggacacaagctggagtacaactacaactcccacaacgtatacatcatggccgacaagcagaaga  
 aacggcatcaagggtgaacttcaagatcaggcacaacatcgaagatggaagcgtgcaactggcggaccactaccagcagaacaagccatcgggcga  
 tggcctgtcctgctgcccggacaaccattacctgtccaacgcaatctgcctctccaaggacccaacgagaagagggaccacatggtcctgctgga  
 agttcgtgacggctgctgggatcacgcatggcatggatgaactctacaagtga

|     |     |     |     |     |     |     |     |     |     |     |     |     |     |     |     |     |     |     |     |
|-----|-----|-----|-----|-----|-----|-----|-----|-----|-----|-----|-----|-----|-----|-----|-----|-----|-----|-----|-----|
| atg | ggc | aag | ggc | gag | gaa | ctg | ttc | act | ggc | gtg | gtc | cca | atc | ctg | gtg | gaa | ctg | gat | ggt |
| M   | G   | K   | G   | E   | E   | L   | F   | T   | G   | V   | V   | P   | I   | L   | V   | E   | L   | D   | G   |
| gat | gaa | cgg | gca | caa | ggt | ctc | cgt | cag | cgg | aga | ggg | tga | agg | tga | tgc | cac | cta | cgg | aaa |
| D   | E   | R   | A   | Q   | V   | L   | R   | Q   | R   | R   | G   | -   | R   | -   | C   | H   | L   | R   | K   |
| gct | cac | cct | gaa | ggt | cat | ctg | cac | tac | cgg | aaa | gct | ccc | tgt | tcc | gtg | gcc | aac | cct | cgt |
| A   | H   | P   | E   | V   | H   | L   | H   | Y   | R   | K   | A   | P   | C   | S   | V   | A   | N   | P   | R   |
| cac | cac | ttt | cac | cta | cgg | tgt | tca | gtg | ctt | ctc | ccg | gta | ccc | aga | tca | cat | gaa | gca | gca |
| H   | H   | F   | H   | L   | R   | C   | S   | V   | L   | L   | P   | V   | P   | R   | S   | H   | E   | A   | A   |
| tga | ctt | ctt | caa | gag | cgc | cat | gcc | cga | agg | cta | cgt | gca | aga | aag | gac | tat | ctt | ctt | caa |
| -   | L   | L   | Q   | E   | R   | H   | A   | R   | R   | L   | R   | A   | R   | K   | D   | Y   | L   | L   | Q   |
| gga | tga | cgg | gaa | cta | caa | gac | acg | tgc | cga | agt | caa | ggt | cga | agg | tga | tac | cct | ggt | gaa |
| G   | -   | R   | E   | L   | Q   | D   | T   | C   | R   | S   | Q   | V   | R   | R   | -   | Y   | P   | G   | E   |
| ccg | cat | cga | gct | gaa | agg | tat | cga | ttt | caa | gga | aga | tgg | aaa | cat | cct | cgg | aca | caa | gct |
| P   | H   | R   | A   | E   | R   | Y   | R   | F   | Q   | G   | R   | W   | K   | H   | P   | R   | T   | Q   | A   |
| gga | gta | caa | cta | caa | ctc | cca | caa | cgt | ata | cat | cat | ggc | cga | caa | gca | gaa | gaa | cgg | cat |
| G   | V   | Q   | L   | Q   | L   | P   | Q   | R   | I   | H   | H   | G   | R   | Q   | A   | E   | E   | R   | H   |
| caa | ggt | gaa | ctt | caa | gat | cag | gca | caa | cat | cga | aga | tgg | aag | cgt | gca | act | ggc | gga | cca |
| Q   | G   | E   | L   | Q   | D   | Q   | A   | Q   | H   | R   | R   | W   | K   | R   | A   | T   | G   | G   | P   |
| cta | cca | gca | gaa | cac | gcc | cat | cgg | cga | tgg | ccc | tgt | cct | gct | gcc | gga | caa | cca | tta | cct |
| L   | P   | A   | E   | H   | A   | H   | R   | R   | W   | P   | C   | P   | A   | A   | G   | Q   | P   | L   | P   |
| gtc | cac | gca | atc | tgc | cct | ctc | caa | gga | ccc | caa | cga | gaa | gag | gga | cca | cat | ggt | cct | gct |
| V   | H   | A   | I   | C   | P   | L   | Q   | G   | P   | Q   | R   | E   | E   | G   | P   | H   | G   | P   | A   |
| gga | ggt | cgt | gac | ggc | tgc | tgg | gat | cac | gca | tgg | cat | gga | tga | act | cta | caa | gtg |     |     |
| G   | V   | R   | D   | G   | C   | W   | D   | H   | A   | W   | H   | G   | -   | T   | L   | Q   | V   |     |     |

**EC8 co-transforming event: monoallelic**

**Allele 1: deletion of T**

AtgggcaaggggcgaggaactgttcaactggcgtgggtcccaatcctgggtggaactggatggtgatgTgaaagggcacaaagtctccgctcagcggaga  
 ggggtgaaggatgacccctacggaagctcaccctgaagttcatctgactaccggaaagctccctgttccggtggccaaccctcgtcaccactt  
 tcacctacgggtgttcagtgcttctcccggtaaccagatcacatgaagcagcatgacttcttcaagagcgccatgccgaaggctacgtgcaaga  
 aggactatcttcttcaaggatgacgggaactacaagacacgtgccgaagtcaagttcgaagggtgataccctgggaaccgcacatcgagctgaaagg  
 tatcgatttcaaggaagatggaacatcctcggacacaagctggagtacaactacaactcccacaacgtatacatcatggccgacaagcagaaga  
 acggcatcaagggtgaacttcaagatcaggcacaacatcgaagatggaagcgtgcaactggcggaccactaccagcagaacaagccatcgggcat  
 ggcctgtcctgctgcccggacaaccattacctgtccaacgcaatctgcctctccaaggacccaacgagaagagggaccacatggtcctgctgga  
 gttcgtgacggctgctgggatcacgcatggcatggatgaactctacaagtga



atg ggc aag ggc gag gaa ctg ttc act ggc gtg gtc cca atc ctg gtg gaa ctg gat ggt  
M G K G E E L F T G V V P I L V E L D G  
gat gga acg ggc aca agt tct ccg tca ggc gag agg gtg aag gtg atg cca cct acg gaa  
D G T G T S S P S A E R V K V M P P T E  
agc tca ccc tga agt tca tct gca cta ccg gaa agc tcc ctg ttc cgt ggc caa ccc tcg  
S S P - S S S A L P E S S L F R G Q P S  
tca cca ctt tca cct acg gtg ttc agt gct tct ccc ggt acc cag atc aca tga agc agc  
S P L S P T V F S A S P G T Q I T - S S  
atg act tct tca aga gcg cca tgc ccg aag gct acg tgc aag aaa gga cta tct tct tca  
M T S S R A P C P K A T C K K G L S S S  
agg atg acg gga act aca aga cac gtg ccg aag tca agt tgc aag gtg ata ccc tgg tga  
R M T G T T R H V P K S S S K V I P W -  
acc gca tgc agc tga aag gta tgc att tca agg aag atg gaa aca tcc tgc gac aca agc  
T A S S - K V S I S R K M E T S S D T S  
tgg agt aca act aca act ccc aca acg tat aca tca tgg ccg aca agc aga aga acg gca  
W S T T T T P T Y T S W P T S R R T A  
tca agg tga act tca aga tca ggc aca aca tgc aag atg gaa gcg tgc aac tgg ccg acc  
S R - T S R S G T T S K M E A C N W R T  
act acc agc aga aca cgc cca tgc gcg atg gcc ctg tcc tgc tgc ccg aca acc att acc  
T T S R A T R P S A M A L S C C R T T I T  
tgt cca cgc aat ctg ccc tct cca agg acc cca agc aga aga ggg acc aca tgg tcc tgc  
C P R N L P S P R T P T R R G T T W S C  
tgg agt tgc tga ccg ctg ctg gga tca ccg atg gca tgg atg aac tct aca agt  
W S S - R L L G S R M A W M N S T S

**Allele 2: no indels**

Atggggcaaggggcaggaactgttcaactggcgtggtcccaatcctgggtggaactggatgggtgatgtgaaaggcacaagttctccgtcagcgggaga  
gggtgaagggtgatgccacctacggaagctcaccctgaagttcatctgactaccggaagctccctgttccgtggccaaccctcgtcaccactt  
tcacctacgggtgttcagtcttctcccggtaaccagatcacatgaagcagcatgacttctcaagagcgccatgcccggaaggctacgtgcaagaa  
aggactatcttcttcaaggatgacgggaactacaagacacgtgcccgaagtcaagttcgaagggtgataaccctggtaaccgcatcgagctgaaagg  
tatcgatttcaaggaagatggaaacatcctcggacacaagctggagtacaactacaactcccacaacgtatacatcatggccgacaagcagaaga  
acggcatcaagggtgaacttcaagatcaggcacaacatcgaagatggaagcgtgcaactggcggaccactaccagcagaacacgcccacatcggcgat  
ggcctgtcctgctgcccggacaaccattacctgtccacgcaatctgcctctccaaggacccaacgagaagaggggaccacatggtcctgctgga  
gttcgtgacggctgctgggatcacgcatggcatggatgaactctacaagtga

atg ggc aag ggc gag gaa ctg ttc act ggc gtg gtc cca atc ctg gtg gaa ctg gat ggt  
M G K G E E L F T G V V P I L V E L D G  
gat gtg aac ggg cac aag ttc tcc gtc agc gga gag ggt gat gcc acc tac gga  
D V N G H K F S V S G E G E G D A T Y G  
aag ctc acc ctg aag ttc atc tgc act acc gga aag ctc cct gtt ccg tgg cca acc ctc  
K L T L K F I C T T G K L P V P W P T L  
gtc acc act ttc acc tac ggt gtt cag tgc ttc tcc ccg tac cca gat cac atg aag cag  
V T T F T Y G V Q C F S R Y P D H M K Q  
cat gac ttc ttc aag agc gcc atg ccc gaa ggc tac gtg caa gaa agg act atc ttc ttc  
H D F F K S A M P E G Y V Q E R T I F F  
aag gat gac ggg aac tac aag aca cgt gcc gaa gtc aag ttc gaa ggt gat acc ctg gtg  
K D D G N Y K T R A E V K F E G D T L V  
aac cgc atc gag ctg aaa ggt atc gat ttc aag gaa gat gga aac atc ctc gga cac aag  
N R I E L K G I D F K E D G N I L G H K  
ctg gag tac aac tac aac tcc cac aac gta tac atc atg gcc gac aag cag aag aac ggc  
L E Y N Y N S H N V Y I M A D K Q K N G  
atc aag gtg aac ttc aag atc agg cac aac atc gaa gat gga agc gtg caa ctg gcg gac  
I K V N F K I R H N I E D G S V Q L A D  
cac tac cag cag aac agc ccc atc ggc gat ggc cct gtc ctg ccg gac aac cat tac  
H Y Q Q N T P I G D G P V L L P D N H Y  
ctg tcc acg caa tct gcc ctc tcc aag gac ccc aac gag aag agg gac cac atg gtc ctg  
L S T Q S A L S K D P N E K R D H M V L  
ctg gag ttc gtg acg gct gct ggg atc agc cat ggc atg gat gaa ctc tac aag tga  
L E F V T A A G I T H G M D E L Y K -

**EC9 co-transforming event: monoallelic**

**Allele 1: no indels**

Atggggcaaggggcaggaactgttcaactggcgtggtcccaatcctgggtggaactggatgggtgatgtgaaaggcacaagttctccgtcagcgggaga  
gggtgaagggtgatgccacctacggaagctcaccctgaagttcatctgactaccggaagctccctgttccgtggccaaccctcgtcaccactt  
tcacctacgggtgttcagtcttctcccggtaaccagatcacatgaagcagcatgacttctcaagagcgccatgcccggaaggctacgtgcaagaa  
aggactatcttcttcaaggatgacgggaactacaagacacgtgcccgaagtcaagttcgaagggtgataaccctggtaaccgcatcgagctgaaagg  
tatcgatttcaaggaagatggaaacatcctcggacacaagctggagtacaactacaactcccacaacgtatacatcatggccgacaagcagaaga  
acggcatcaagggtgaacttcaagatcaggcacaacatcgaagatggaagcgtgcaactggcggaccactaccagcagaacacgcccacatcggcgat  
ggcctgtcctgctgcccggacaaccattacctgtccacgcaatctgcctctccaaggacccaacgagaagaggggaccacatggtcctgctgga  
gttcgtgacggctgctgggatcacgcatggcatggatgaactctacaagtga

atg ggc aag ggc gag gaa ctg ttc act ggc gtg gtc cca atc ctg gtg gaa ctg gat ggt  
M G K G E E L F T G V V P I L V E L D G  
gat gtg aac ggg cac aag ttc tcc gtc agc gga gag ggt gat gcc acc tac gga  
D V N G H K F S V S G E G E G D A T Y G  
aag ctc acc ctg aag ttc atc tgc act acc gga aag ctc cct gtt ccg tgg cca acc ctc  
K L T L K F I C T T G K L P V P W P T L  
gtc acc act ttc acc tac ggt gtt cag tgc ttc tcc ccg tac cca gat cac atg aag cag  
V T T F T Y G V Q C F S R Y P D H M K Q  
cat gac ttc ttc aag agc gcc atg ccc gaa ggc tac gtg caa gaa agg act atc ttc ttc

|     |     |     |     |     |     |     |     |     |     |     |     |     |     |     |     |     |     |     |     |
|-----|-----|-----|-----|-----|-----|-----|-----|-----|-----|-----|-----|-----|-----|-----|-----|-----|-----|-----|-----|
| H   | D   | F   | F   | K   | S   | A   | M   | P   | E   | G   | Y   | V   | Q   | E   | R   | T   | I   | F   | F   |
| aag | gat | gac | ggg | aac | tac | aag | aca | cgt | gcc | gaa | gtc | aag | ttc | gaa | ggg | gat | acc | ctg | gtg |
| K   | D   | D   | G   | N   | Y   | K   | T   | R   | A   | E   | V   | K   | F   | E   | G   | D   | T   | L   | V   |
| aac | cgc | atc | gag | ctg | aaa | ggg | atc | gat | ttc | aag | gaa | gat | gga | aac | atc | ctc | gga | cac | aag |
| N   | R   | I   | E   | L   | K   | G   | I   | D   | F   | K   | E   | D   | G   | N   | I   | L   | G   | H   | K   |
| ctg | gag | tac | aac | tac | aac | tcc | cac | aac | gta | tac | atc | atg | gcc | gac | aag | cag | aag | aac | ggc |
| L   | E   | Y   | N   | Y   | N   | S   | H   | N   | V   | Y   | I   | M   | A   | D   | K   | Q   | K   | N   | G   |
| atc | aag | gtg | aac | ttc | aag | atc | agg | cac | aac | atc | gaa | gat | gga | agc | gtg | caa | ctg | gcg | gac |
| I   | K   | V   | N   | F   | K   | I   | R   | H   | N   | I   | E   | D   | G   | S   | V   | Q   | L   | A   | D   |
| cac | tac | cag | cag | aac | acg | ccc | atc | ggc | gat | ggc | cct | gtc | ctg | ctg | ccg | gac | aac | cat | tac |
| H   | Y   | Q   | Q   | N   | T   | P   | I   | G   | D   | G   | P   | V   | L   | L   | P   | D   | N   | H   | Y   |
| ctg | tcc | acg | caa | tct | gcc | tcc | acc | gag | aac | ggg | gac | caa | agg | agg | gac | cac | atg | gtc | ctg |
| L   | S   | T   | Q   | S   | A   | L   | S   | K   | D   | P   | N   | E   | K   | R   | D   | H   | M   | V   | L   |
| ctg | gag | ttc | gtg | acg | gct | gct | ggg | atc | acg | cat | ggc | atg | gat | gaa | ctc | tac | aag | tga |     |
| L   | E   | F   | V   | T   | A   | A   | G   | I   | T   | H   | G   | M   | D   | E   | L   | Y   | K   | -   |     |

**Allele 2: deletion of TG**

AtggggcaagggcgaggaaactgttcaactggcgtgggtcccaatcctgggtggaactggatgggtgatgTGaaacgggcacaaagtctccgctcagcggag  
 aggggtgaaggtgatgccacctacggaaagctcaccctgaagttcatctgcactaccggaaagctccctgttccggtggccaaccctcgtcaccact  
 ttcacctacgggtgttcagtgttctcccggtaccagatcacatgaagcagcatgacttcttcaagagcgccatgccgaaggctacgtgcaaga  
 aaggactatcttcttcaaggatgacgggaaactacaagacacgtgcccgaagtcaagttcgaagggtgataccctgggtaaccgcatcgagctgaaag  
 gtatcgatttcaaggaagatggaaacatcctcggacacaagctggagtacaactacaactcccacaacgtatacatatgcccgcagaacgagaag  
 aacggcatcaaggtgaacttcaagatcaggcacaacatcgaagatggaagcgtgcaactgcccggaccactaccagcagaacacgcccacggcga  
 tggccctgtcctgtgcccggacaaccattacctgtccacgcaatctgcctctccaaggaccccacgagaagaggggaccacatggctcctgtctg  
 agttcgtgacggctgtgggatcacgcatggcatggatgaactctacaagtga

|     |     |     |     |     |     |     |     |     |     |     |     |     |     |     |     |     |     |     |     |
|-----|-----|-----|-----|-----|-----|-----|-----|-----|-----|-----|-----|-----|-----|-----|-----|-----|-----|-----|-----|
| atg | ggc | aag | ggc | gag | gaa | ctg | ttc | act | ggc | gtg | gtc | cca | atc | ctg | gtg | gaa | ctg | gat | ggg |
| M   | G   | K   | G   | E   | E   | L   | F   | T   | G   | V   | V   | P   | I   | L   | V   | E   | L   | D   | G   |
| gat | gaa | cgg | gca | caa | ggt | ctc | cgt | cag | cgg | aga | ggg | tga | agg | tga | tgc | cac | cta | cgg | aaa |
| D   | E   | R   | A   | Q   | V   | L   | R   | Q   | R   | R   | G   | -   | R   | -   | C   | H   | L   | R   | K   |
| gct | cac | cct | gaa | ggt | cat | ctg | cac | tac | cgg | aaa | gct | ccc | tgt | tcc | gtg | gcc | aac | cct | cgt |
| A   | H   | P   | E   | V   | H   | L   | H   | Y   | R   | K   | A   | P   | C   | S   | V   | A   | N   | P   | R   |
| cac | cac | ttt | cac | cta | cgg | tgt | tca | gtg | ctt | ctc | ccg | gta | ccc | aga | tca | cat | gaa | gca | gca |
| H   | H   | F   | H   | L   | R   | C   | S   | V   | L   | L   | P   | V   | P   | R   | S   | H   | E   | A   | A   |
| tga | ctt | ctt | caa | gag | cgc | cat | gcc | cga | agg | cta | cgt | gca | aga | aag | gac | tat | ctt | ctt | caa |
| -   | L   | L   | Q   | E   | R   | H   | A   | R   | R   | L   | R   | A   | R   | K   | D   | Y   | L   | L   | Q   |
| gga | tga | cgg | gaa | cta | caa | gac | acg | tgc | cga | agt | caa | ggt | cga | agg | tga | tac | cct | ggg | gaa |
| G   | -   | R   | E   | L   | Q   | D   | T   | C   | R   | S   | Q   | V   | R   | R   | -   | Y   | P   | G   | E   |
| ccg | cat | cga | gct | gaa | agg | tat | cga | ttt | caa | gga | aga | tgg | aaa | cat | cct | cgg | aca | caa | gct |
| P   | H   | R   | A   | E   | R   | Y   | R   | F   | Q   | G   | R   | W   | K   | H   | P   | R   | T   | Q   | A   |
| gga | gta | caa | cta | caa | ctc | cca | caa | cgt | ata | cat | cat | ggc | cga | caa | gca | gaa | gaa | cgg | cat |
| G   | V   | Q   | L   | Q   | L   | P   | Q   | R   | I   | H   | H   | G   | R   | Q   | A   | E   | E   | R   | H   |
| caa | ggg | gaa | ctt | caa | gat | cag | gca | caa | cat | cga | aga | tgg | aag | cgt | gca | act | ggc | gga | cca |
| Q   | G   | E   | L   | Q   | D   | Q   | A   | Q   | H   | R   | R   | W   | K   | R   | A   | T   | G   | G   | P   |
| cta | cca | gca | gaa | cac | gcc | cat | cgg | cga | tgg | ccc | tgt | cct | gct | gcc | gga | caa | cca | tta | cct |
| L   | P   | A   | E   | H   | A   | H   | R   | W   | P   | C   | P   | A   | A   | G   | Q   | P   | L   | P   |     |
| gtc | cac | gca | atc | tgc | cct | ctc | caa | gga | ccc | caa | cga | gaa | gag | gga | cca | cat | ggg | cct | gct |
| V   | H   | A   | I   | C   | P   | L   | Q   | G   | P   | Q   | R   | E   | E   | G   | P   | H   | G   | P   | A   |
| gga | ggt | cgt | gac | ggc | tgc | tgg | gat | cac | gca | tgg | cat | gga | tga | act | cta | caa | gtg |     |     |
| G   | V   | R   | D   | G   | C   | W   | D   | H   | A   | W   | H   | G   | -   | T   | L   | Q   | V   |     |     |

**EC10 co-transforming event: biallelic**

**Allele 1: deletions of TG**

AtggggcaagggcgaggaaactgttcaactggcgtgggtcccaatcctgggtggaactggatgggtgatgTGaaacgggcacaaagtctccgctcagcggag  
 aggggtgaaggtgatgccacctacggaaagctcaccctgaagttcatctgcactaccggaaagctccctgttccggtggccaaccctcgtcaccact  
 ttcacctacgggtgttcagtgttctcccggtaccagatcacatgaagcagcatgacttcttcaagagcgccatgccgaaggctacgtgcaaga  
 aaggactatcttcttcaaggatgacgggaaactacaagacacgtgcccgaagtcaagttcgaagggtgataccctgggtaaccgcatcgagctgaaag  
 gtatcgatttcaaggaagatggaaacatcctcggacacaagctggagtacaactacaactcccacaacgtatacatatgcccgcagaacgagaag  
 aacggcatcaaggtgaacttcaagatcaggcacaacatcgaagatggaagcgtgcaactgcccggaccactaccagcagaacacgcccacggcga  
 tggccctgtcctgtgcccggacaaccattacctgtccacgcaatctgcctctccaaggaccccacgagaagaggggaccacatggctcctgtctg  
 agttcgtgacggctgtgggatcacgcatggcatggatgaactctacaagtga

|     |     |     |     |     |     |     |     |     |     |     |     |     |     |     |     |     |     |     |     |
|-----|-----|-----|-----|-----|-----|-----|-----|-----|-----|-----|-----|-----|-----|-----|-----|-----|-----|-----|-----|
| atg | ggc | aag | ggc | gag | gaa | ctg | ttc | act | ggc | gtg | gtc | cca | atc | ctg | gtg | gaa | ctg | gat | ggg |
| M   | G   | K   | G   | E   | E   | L   | F   | T   | G   | V   | V   | P   | I   | L   | V   | E   | L   | D   | G   |
| gat | gaa | cgg | gca | caa | ggt | ctc | cgt | cag | cgg | aga | ggg | tga | agg | tga | tgc | cac | cta | cgg | aaa |
| D   | E   | R   | A   | Q   | V   | L   | R   | Q   | R   | R   | G   | -   | R   | -   | C   | H   | L   | R   | K   |
| gct | cac | cct | gaa | ggt | cat | ctg | cac | tac | cgg | aaa | gct | ccc | tgt | tcc | gtg | gcc | aac | cct | cgt |
| A   | H   | P   | E   | V   | H   | L   | H   | Y   | R   | K   | A   | P   | C   | S   | V   | A   | N   | P   | R   |
| cac | cac | ttt | cac | cta | cgg | tgt | tca | gtg | ctt | ctc | ccg | gta | ccc | aga | tca | cat | gaa | gca | gca |
| H   | H   | F   | H   | L   | R   | C   | S   | V   | L   | L   | P   | V   | P   | R   | S   | H   | E   | A   | A   |
| tga | ctt | ctt | caa | gag | cgc | cat | gcc | cga | agg | cta | cgt | gca | aga | aag | gac | tat | ctt | ctt | caa |
| -   | L   | L   | Q   | E   | R   | H   | A   | R   | R   | L   | R   | A   | R   | K   | D   | Y   | L   | L   | Q   |
| gga | tga | cgg | gaa | cta | caa | gac | acg | tgc | cga | agt | caa | ggt | cga | agg | tga | tac | cct | ggg | gaa |
| G   | -   | R   | E   | L   | Q   | D   | T   | C   | R   | S   | Q   | V   | R   | R   | -   | Y   | P   | G   | E   |
| ccg | cat | cga | gct | gaa | agg | tat | cga | ttt | caa | gga | aga | tgg | aaa | cat | cct | cgg | aca | caa | gct |
| P   | H   | R   | A   | E   | R   | Y   | R   | F   | Q   | G   | R   | W   | K   | H   | P   | R   | T   | Q   | A   |
| gga | gta | caa | cta | caa | ctc | cca | caa | cgt | ata | cat | cat | ggc | cga | caa | gca | gaa | gaa | cgg | cat |
| G   | V   | Q   | L   | Q   | L   | P   | Q   | R   | I   | H   | H   | G   | R   | Q   | A   | E   | E   | R   | H   |

caa ggt gaa ctt caa gat cag gca caa cat cga aga tgg aag cgt gca act ggc gga cca  
 Q G E L Q D Q A Q H R R W K R A T G G P  
 cta cca gca gaa cac gcc cat cgg cga tgg ccc tgt cct gct gcc gga caa cca tta cct  
 L P A E H A H R R W P C P A A G Q P L P  
 gtc cac gca atc tgc cct ctc caa gga ccc caa cga gaa gag gga cca cat ggt cct gct  
 V H A I C P L Q G P Q R E E G P H G P A  
 gga gtt cgt gac ggc tgc tgg gat cac gca tgg cat gga tga act cta caa gtg  
 G V R D G C W D H A W H G - T L Q V

**Allele 2: deletion of T**

AtggggcaagggcgagggaactgttcaactggcgtgggtcccaatcctgggtggaactggatgggtgatgTgaaaggcacaagttctccgtcagcggaga  
 ggggtgaaggtgatgccacctacggaaagctcaccctgaagttcatctgcaactaccggaaagctccctgttccgtggccaacctcgtcaccactt  
 tcacctacgggtgttcaactgttctcccggtaccagatcacatgaagcagcatgacttctcaagagcgccatgcccaaggtacgtgcaagaa  
 aggactatcttcttcaaggtgacgggaactacaagacacgtgcccgaagtcgaagttcgaaggtgataccctgggaaccgcatcgagctgaaagg  
 tatcgatttcaaggaagatggaaacatcctcggacacaagctggagtacaactacaactcccacaacgtatacatcatggccgacaagcagaaga  
 acggcatcaaggtgaaacttcaagatcaggcacaacatcgaagatggaagcgtgcaactggcggaccactaccagcagaacacgcccacatcggcgat  
 ggccctgtcctgctgcccggacaaccattacctgtccacgcaatctgcctctccaaggacccaacgagaagagggaccacatggtcctgctgga  
 gttcgtgacggcgtgctgggatcacgcatggcatggatgaaactctacaagtga

atg ggc aag ggc gag gaa ctg ttc act ggc gtg gtc cca atc ctg gtg gaa ctg gat ggt  
 M G K G E E L F T G V V P I L V E L D G  
 gat gga acg ggc aca agt tct ccg tca cgc gag agg gtg aag gtg atg cca cct acg gaa  
 D G T G T S S P S A E R V K V M P P T E  
 agc tca ccc tga agt tca tct gca cta ccg gaa agc tcc ctg ttc cgt ggc caa ccc tcg  
 S S P - S S S A L P E S S L F R G Q P S  
 tca cca ctt tca cct acg gtg ttc agt gct tct ccc ggt acc cag atc aca tga agc agc  
 S P L S P T V F S A S P G T Q I T - S S  
 atg act tct tca aga ggc cca tgc ccg aag gct acg tgc aag aaa gga cta tct tct tca  
 M T S S R A P C P K A T C K K G L S S S  
 agg atg acg gga act aca aga cac gtg ccg aag tca agt tgc aag gtg ata ccc tgg tga  
 R M T G T T R H V P K S S S K V I P W -  
 acc gca tgc agc tga aag gta tgc att tca agg aag atg gaa aca tcc tgc gac aca agc  
 T A S S - K V S I S R K M E T S S D T S  
 tgg agt aca act aca act ccc aca acg tat aca tca tgg ccg aca agc aga aga acg gca  
 W S T T T T P T T Y T S W P T S R R T A  
 tca agg tga act tca aga tca ggc aca aca tgc aag atg gaa ggc tgc aac tgg cgg acc  
 S R - T S R S G T T S K M E A C N W R T  
 act acc agc aga aca cgc cca tgc ggc atg gcc ctg tcc tgc tgc cgg aca acc att acc  
 T T S R T R P S A M A L S C C R T T I T  
 tgt cca cgc aat ctg ccc tct cca agg acc cca acg aga aga ggg acc aca tgg tcc tgc  
 C P R N L P S P R T P T R R G T T W S C  
 tgg agt tgc tga cgg ctg ctg gga tca cgc atg gca tgg atg aac tct aca agt  
 W S S - R L L G S R M A W M N S T S
